# Supplementary material for: Molecular and Functional Analyses of Characterized Sesquiterpene Synthases in Mushroom-Forming Fungi
Source: MDPI journal article supplement (doi:10.3390/jof9101017), 2023-10-14
Supplement: s1 [file s1]

>LdSTS1

MSLSPSYFILPDLFSHSTAFHDATNPFWKRASAESRRWVNSYTVFVDRRRAFFFFQGGQSELL  
SSHCPYPYAGYEEFRTCCDLINLLFVIDELSDEQCYGDARRTGDIFLQAMRDPTWSDGSKLA  
QMTADFRERLVTTVKPKTFRRFMEHCDAYVDSVVEEAGLRDRGEILEEYVHLRRENSA  
VRVCFGLISYILGIDLPEVFSDFTFQKMYFSAVDMVCWANDLYSYNMELNRGLEGNFIT  
VLMKTQNMIDIQAACNFVGGHYKQLMDDFLSAKASLRSFGSKVDVDVRRYIEACQHWPV  
GNLVWSFETPRYFGARRDQIRRTRVVPLKPLEREPLSEDD

>LdSTS2

MSGLPQFYLPDLVAQWPWPRI LNQH YEEAKPESDEWLRGFEALDVKSQRSFDRCNLALL  
SSLGYPSLGKDCLRVACDLMVLFYIYDEYTDKLDGDGARDCADIVMRALRNPHKERSQG  
ESKLGEITRQFWLRAIKVASESAQRRFLKSFAAFVYAIIDEASDRNDGRIRSITDYLELRRLT  
VGAYASFFSLELGLDIPDEVMTHPAMESLLGLVTDSIVLTNDVNQDLYSYNNEQAAGHGG  
HNILTVMNEKGVLDLGALDWLAEYNGAILSRFQAQYRMLPSWGPDPDPIVTTTFVERLG  
HWIRGHDCWSFESERYFGTKGPEIQKHRVVTLLPRSTRPDVTPMMAQPVL

>LdSTS3

MHSSANSFYLPDLLVLSKPFKGSTNPHYKKAASRAWVNSYNIFTDRKRAFFIQGYNEL  
LVSHTYPHAGYEEFRTICDFVNLLFVVDEVSDDQNGADARRTGEVYLNAMKYPGWDGGS  
ALAKMTGEFRARLTRTSGPFSFRRFLKHCQDYIECVAREAEYRERGEVLDMESFKHLRRE  
NSAIRLCFGLFEYSLGIDLPEIFENPVFESLYWAAADMVCWANDVYSYNMEQAKGHTG  
NNIVTVLMKAHGCDLQTASDIIGAHYAELMERYLADRERLPSFGVEIDADVQLYVRAMEN  
WPIGNLEWSFETNRYFGPLHDEVKRTRLIVLTPRRDDSDDTSD

>LdSTS6

MSSADSSPTLSPSSTPPDSPLSSTRALSPTPTIHAPAFFVLPDLVSHCPFSVPYHDDGDAVAA  
ESLDWILSYVQHFAQDKVAAMCGLQAGELTAYCYNCSRDRLRVVSDFMNYLFHLDNVS  
DGFLARDAAGLADWVMNAFEWPD SYRPVQGGQGGVEEISA AKLARDYWSRCIRDCAPA  
VQQRFKSSMQMFFQAVHQQALFRANGVVPDLETYIDMRRDTSGCKPVFDLIEYSLDLELP  
DVVVEDPVIVALNQGANDLVTWSNDIFSYNVEQSRGDTHNMICVYMIHDGLSLQQAVDR  
VGNMCKRTIETFVENQARIPSWGDGIDEDVKLYVHGLREWIVGSLHWSFVTTRYFGDDG  
EFVRTTRIVDLLTQEEDAKGEVVDLSC

>LdSTS7

MSELPQFHLPDLLAQWPWPRLSNQH YEETKPAFNEWVRSFEALDPKSQSADFRCNFALLS  
SIGHPLL NKDCLRVTC DLMALYFLYDEYTDKLDDEDGVRTCADVVT DALRNPHKERPQGE  
SKLGEIARQFWLRAIKVASEGAQRRFLKSFTTYAYSIIETS DRNSGRVRSIADCLELRRRTS  
AVYSTLFCVELGLDIPDEVMTHPAMVSL LALAI DPLMLTNDLYSYNIEQAAGHGGHNILTA  
IMNEKGVLDLGALDWFAEYNGAILSKFQAQYRMLPSWGPDLDPITAYVERLCYWIRGH  
DCWSFESERYFGKKGPEIQKHRVVTLLPRSTRPDVTPMMAQPVL

>LdSTS8

MSERYYIPKTLENWKWPRRINPHHNEVKAAAEAWIRGFRAFSPKAQEAYDRFLLASLGY  
WHDKARLRTAGDLANLIFVYDEFSDAGNEIQVQAMANVMVDALRNPHIPRPQGEWIGGE  
ISRQFWELAIKTASPQAQKRFIKVF DAYAQAVVQEAADRGHKYVRSVHEYLEVRRDTIGG  
RPAFSIIELGLNLPDEVVEHPAIEDMTAWAVDMLILDNDIASYNVEQARGDDGHNIVTIVM  
HEHKTDIQGAMNWIHSYHKELEAKFMDRYENGIPTFGGPVDTELARYLDGIGNFVRAHE  
QWNFETER

>LdSTS10

MRSHDPTNKLIIPIFPAYPRRILAAATRIHTGDNTMPERYYIPKTLENWKWPRRINPYHNE  
VQAAAVAWIRSFVGFSPKAQEAYDRFLFASLAYPLHDKARLRTGCDLVNLIFVYDEFSE  
NEGEGRMGWGRNRQTIYSRFRWLAIKTASPAQKRFIKVYDAFAQALVQEAAADRDEHI  
RGVQEYFELRRDTISARPAFALIELDMNLPDEAVSHPVIEEMTILAIMIILDNDIASYNVEQ  
ARGDDGHNIITIVIHKHKTDIHGAMNWWHNRHKELEAKFMDLYENKIPNFGEPVDTELLR  
YVDGIGNLVRANDQWNFETERYFGKKALEIGRTRWVTLLPKERPEYIGPLLVDGSL

>LdSTS11

MSEFRLPNLLAQWPWPRAINKHYEEIKVQFDEWVHAFGALDTKSQKLFDRCNFALLASL  
GYPLLDKECLLVACELMALFFIYDEYTDKLDDEAGARICADAVMDALRDPHKERPQDEPKP  
GEIAKQFWLHAIKVASDSTQRRIDSFGPYVYAVVEEAADRQGRIRGITDYLDLRVRASA  
AYCTLFPLEMGLDIPDEVMTHPAMKTFLDLIVYPLCLTNDLYSYNIEQAVPGHAAHNLLTV  
VMNEKGVDLNGALDWYTEYNEAKLAKSLEQHRKLPSWGPEMDLAVTTFVEGVGYWM  
RGHDCWSFEAERYFGAKGPEIQKHRMVTLPKSTEITPMMALPSAC

>LdSTS12

MLELPQFCLPDLFAQWPWPRLSNQHYEETKPESDEWVRSFEALDARSQSADFRCNFALLS  
SIGHPLLDKDCLRVTCDLMALFFMYDEYTDNLDEDGVRTCADVVDALRNPHERPQGE  
SKLGEIARQFWLRAIKVASEGAQRRFLKSFAEFAYSIIETSDRNAGRVRISITDYELRRRTS  
AVYSTLFSVELGLDIPDEVMTHPAMVSLALAVDPLMLTNDLYSYNVEQAAGHGHNLLT  
AIMNEKGVDLGDALDWFAEYNGLTRDVPEPVPTPGSDELLIDVHSAGLNFFDSQGYQT  
QPPRPVFLGAEFAGTVATAPPGSPYKPGDRVFGCCQGAYGERVVAKPVDVLPDLSFDQ  
GAGEWLLVLAAAGGVGIAAIQIGKVLGARVVACASPSKLNARTVGGADVFVDYTKDG  
WQKEVLKITGGRGVLDVYDPVGRIKDALKCTVWGGRALVVGFAFAST

>LdSTS14

MSNTQFSLPDPLARWPWPRLNQHYAEVKPESDQWVHGFEALDPKSQRSFDCNFSLLGS  
LVYPLLDKDGVRVGCMLVFFIYDEFTDKVDGDGARVYAEMVMDAIRDPHKERPQGE  
KLGEIARQFWLRAMKISSPEAQRRFITFAEYVYAVIDEASDRANGVRGVEDYKLRLT  
AGGYPSFLAAEAGLNIPDEVMAHPALQTLSLAAESLVTNDMYSYNIEQASGHGHNIVT  
VIMNEKRVDLGDALNWLAEYHGQVLSNFQAQHRLLPSWSPEVDADVSTFVERLAYWIR  
GIDCWSLETERYFGTKGPEIKEHRRITLLPKVKKPDVTPMMAQLNA

>Cop1

MSSLDATIHPVLNFEDKKIVLPDLVSHCNFKLRVSRHRKRITGETKRWLFGDNLVGPARN  
KYHGLKAGLLTAMTYPDAAYPQLRLCNDFTLYLFHIDNLSDDMDNRGTWSTANEVLNSL  
YHPYTYHGQARVGRMTRDYWRRMILTASPGSQQRFIETFDFFFQSVTQQAIDRLTGEIPDL  
ESYIALRRDTSGCKPCWALIEYANNLDLPDEVMDHPVVRSLGEAANDLVTWSNDIFSFN  
EQSKGDTHNMIPVVMHQEGLDLQSAVDFVGEMCKSAIDRFIEDQNYLPSWGPKIDRLA  
VYINGLADWIVGSLHWSFETERYFGKNGRQVKSSRVIDLLPRRSQ

>Cop2

MPSPAGALPKSFILPDLVNDCPFPLRVNPLCDEVGRLSEQWFLRHANYSPRAVAFMALK  
GELTAACYPDADAFHLRVSDDFMNFLFNADDWLDDFDIEDTYGLANCTVRALRDPVNF  
TDKRAGLMTKSYFSRFLKTAGPRCTERFIQTLALYFESVVTQKQARNNGTLPDLESYITIR  
RNSGCKPCYALIEFCAGIDLPEVINHPHIIQSLEDASNDLIAWSNDIFSFNREQSRHDSFNM  
VSIVMHQKGFALQEAVNFVGELCKKAMERFQADKRNLPSWGPEIDGEVAMYVDGLQNW  
IVGSLNWSIDGTERYFGKDGPGIKKHKRVKLFPRPLKTPAVRVLA

>Cop3

MSTPSSSLTTDESPASFILPDLVSHCPFLRYHPKGDEVAKQTVHWLDSNCPDLTAKERKA  
MYGLQAGELTGycypYTTPERLRVVADFLNYLFHLDNISDGMMTRETAVLADVVMNAL  
WFPEDYRPTKGQAAEELNPGKLARDFWSRCIPDCGPGTQARFKETFGSFFEAVNIQARAR  
DEGVIPDLESYIDVRRDTSgCKPCWVLIEYALGIDLPDFVVEHPVIAALNQGTNDLVTWSN  
DIFSYNVEQSKGDTHNMIILMEHHGHTLQSAVDYVGS LCQQTINTFCENKQQLPSWGPEI  
DDMVAKYVQGLEDWIVGSLHWSFQTRRYFGDEGQEIKQHRLVKLLTVAPPPPPPPPTPP PQ  
SSDADTKKQKVKAQDGKGPVSDEEVWALVRAEQSKGSILESLFGFLTTSLSRIFFGYFFAY  
SH

>Cop4

MRPTARQFTLPDLFSICPLQDATNPWYKQAAAESRAWINSYNIFTDRKRAFFIQGSNELL C  
SHVYAYAGYEQFRTCCDFVNLLFVDEISDDQNGQDARATGRIFVNAMRDAHWDGGSIL  
AKITHEFRERFVRLAGPKTVRRFADLCESYTD CVAREAELRERNQVLGLNDFIALRRQNS  
AVLLCYSLVEYILGIDLDDDEVYEDPTFAKAYWAACDFVCWANDVYSYDMEQAKGHTGN  
NVVTVLMKEKDLSLQEASDYIGRECEKQMRDYLEAKS QLLQSTDLPQEAVRYIEALGYW  
MVGNLVWSFESQRYFGAQHERVKATHVVHLRPSSVLEASCDSDSDSDC

>Cop5

MVGSYTGKVIHVPALLESWPWPAAINPLYEQVQEESTSWFRKFDLYRDRKKQAIHDHLD T  
AKFGASVCPKADYALLRLATDYLHLGFWIDYFFDTSPSDVIRQLTESIAHLLES G D PRLDSS  
SPQSHIACMEILRDFRKRIETFNPSQEDLRRFVKEYRGFLEAELTQAIDHENKVIRDIESYLS  
IRRSTIAIRPGIALGLALGIPQEILDDPYTDTLTNACLDMVIIQNDAYSWNVEQVRKADGH  
NIITVLMKQRDIDVQEAYEHAAQLHRETQEHFLELHAKRPDWGNEGSIQAFFDGLGEFVR  
GVDEWSSMCLGEHALSVGAGFLK

>Cop6

MPAALPYNVSRDNKWDIKKIIQDFFKRCDPYQVIPYDTELWNACLKRAKEKGYPVEPDS  
PMSLYRSFKVGVVITRTSYGHIQDYELIWWATFTAFTYADDAFQEDIQHLHSFARTFLQN  
EKHEHPVLEAFAQFLRESSIRFSHFVANTVSSALRFMMSSIALEFEGQNVSVSTEAREYPG  
YIRILSGLSDIYALFAFPMDLPRSTYIQAPEQIDYINGTNDLLSFYKEELDCETVNFISAAAT  
SQQVSKLEVLRNAAEKAAYSYDVVVNVLPYPEALAAWKSFARGFCYFHTSSPRYRLGE  
MFHDFEHDLVCKCASCTEI

>Omp1

MKYTSFALPDLASSCDYNLRFNKYHRSVSPETKKWFFRLSPASQADLTTYDAQRFTLLAA  
VCYPDAGYPQLRVCSDFLAYLFYLDNLTDDMDDKSTRSVADLVNLSLNEPETFQTQYRIG  
KMTSDYFKRIIQTSNDGTTKRFIDTMSFFKSVDDQARDRLAGHIPDLESYIALRRETSGC  
KTCFSLIEYANNLHIPDEVISHPHIEQMETAANDVVSFANDIYSFNIEQSKGDTHNMIPVLM  
HANPDMDFLEAVSFVRDLTIKAMDRFNELRATLPSWGLDIDKDMKVYVNGLENWMVGI  
LFWSFETERYFGKSVRSVKATKTVNLLPSRA

>Omp2

MASTAPSKFILPDLVSHCSFDLHHNRHRKQITTETKKWLFKGDNLTGRKRDQYHGLKCGL  
LSAMCYPNAAYPQLRVCNDFLTLYLFHLDNLSDDMDNRGTTTTADVVLNSLYHPGYFQSA  
RVGKMTRDYWKRLISTASPGTQQRFIETDFFFFQSVTEQAHDRQAGVIPDLESYIALRRDT  
SGCKTSFVLIEYANNLDIPDGVM DHPLIRSLGEAANDLVTWSNDIFSYNVEQAKGDTHNM  
IPVIMNEHGLDLQSAVDYVGRLCQQSIDRFISDRAQLPSWGPEIDRQVAIYVDGLTDWIVG  
SLHWSFESERYFGKSGRQIKKSRVINLLPRRA

>Omp3

MAIENTIASAPASTPAKQLDTPDHFILPDLVSHCTFPLVYHSNGDAVAAQSVKWLDTNCPD  
LNDKRRKALYGLQAGELTAYCYNTAPDQRLRVVSDFMNYLFHLDNISDGMMTKDTDALS  
DAVMNALWFTEWYRPTKKSDYVQPDEELNAGKLARDFWHRCIQDAGPGCQARFKETLE  
LFFEAVNIQAKARDAGVIPDLESYIDVRRDTSGCKPCWALIEYGLGIDLPDYVAEDPIIKSL  
NQSTNDLVTWSNDIFSYNVEQSRGDTHNMIVILMLYHGHNLQSAIDYVGDLCRQTIDDFK  
ENRKKIPSWGPEVDDIVKQYVQGLQDWIVGSLHWSFMTTRYFGKQGQEVKKNRYVKLL  
PVGEEANKW

>Omp4

MYIFCSQVVSGLNKFTFKMSSAPTRFLLPDLLSACPLKGSVNPYYKEAGAESSAWINSYDI  
FTDRKRAFFVQGCNELLVAHTYPYAGYEEFRTCCDFINVLFLVLEVSDEQSGSDARFTGEV  
FLNALRNPENDDTSKLSKISKEFRARYFKRAGPRTAERFLQHCQDYIDCVTREAE LRERGE  
VLDLPSFTALRRENSAIRICFCLFEYALGFDLPQEVFDDPTFMEYWAAADLVCWANDVY  
SYNKEQAQGHGGNNIVTVLMKAKDLDLQAACDYIGVYCEELMGRYLSAKARLPSWGPE  
VDAAVAQYVEASGHWVRGNLDWSFETQRYFGAQHAEIKETRLVTLTPAIPEDFSDTGSES  
E

>Omp5a

MSPDPTRIVLPDFLAACPFESSTKNPHLKAAGAESSAWVNSHVVFNDRKRAAFMQDIYEL  
LVAYAFPWADYEDFRTMCDFINLLFVLDELSDQNGKDAGYTGKLFMDAMRNIDNGDTS  
ELTELCREFKARYSKRVSPQVNERFLQHLQSYTDCVAQEADLRERGEILDLESYVALRREN  
SAIRPCFDLVEYIIDFDIPQEVIDHPVFSEMYWASVDLVCWSNDVYSYNVEQAKGHGGSN  
VVTVLMKEKNLDLQAACDYVGVYEEELMDRYLSAKARLPSWGPEIDAAVGKYILAEAQ  
FVRGNLDWSFDSPPRYFGPQHDQVKKTGIVTLTPAPKKFGSDSGSESE

>Omp5b

MSPAPSRIVLPDFFASCPFESSTINPHFKAAGAESSAWVNSHVVFNDRKRAALMQNSYELL  
VAYAFPWASYEDFRTLCDFINLLFVFDEVSDDQNGKDAGYTSKIFMDAMRNIDNGDHSEL  
TELCKEFKARFSRRLSPQVNERFLQHLQSYTDCVAQEADLRERGEILDLESYVILRRENSA  
VRPCFDLVEYIMDFDIPQEVLDHPVFSEMYWASVDLVCWSNDVYSYNVEQAKGHRGSNV  
VTVLMNEKNLDLQAACDYVGVYYYQELMDRYLSAKARLPSWGPEIDAAVGKYVLAEAQF  
VRGNLDWSFDTPRYFGPQRDQIKKSRIVTLTPAPKKFGSDSGSESE

>Omp6

MIAKNSEIDRFYIPDTLANWPWPRHLNPAYPEAKKASAAWLRSFNAFNERSQKAFDLCDF  
NLLASLAFPLADLYCLRSGCDLMNCFIFDEYSDVADPQTVRQQADIIMDAIRNPHVPRPR  
GEFIGGEAHRQFWERAMQGATPTAQRRFIDTYQQYTDAVVQQATDRADNHIRDVEGYFT  
VRRDTIGAKPSFTLLEFTMDIPDEVMGHPVIKDLSLWCIDMLIIGNDLCSYNVEQAHGDDL  
HNLVTIVMNQYNLDLPGAMEWIGKFHDDIADKFLDTFAKLPSWGPEIDPQIRRYVDGLGN  
WVRGNDSWSFESWRYFRGKGPEIEKTRWVDLMPTEEATITPKYESDSNAAQPAQST

>Omp7

MPETFYLPDCLANWKWKRALNPNYPEVKAASSEWLRSFKAFPKAEAYDRCDFNLLAS  
LAYPLADKDGLRTGCDLMNMFFVFDEYSDVAHESEVQVQADIIMDALRNPHKPRPVGEW  
VGGEVTRQFWELAIKTASPQSQKRFIETFDITYTKSVVQQAADRTQHYVRTVDEYLEVRRD  
TIGAKPSFAILELTMDIPDEVIHHTIERLAILAIDMILLGNDTASYNVEQARGDDNHNMTI  
VMHQYKTDIQGALSWIEKYHKELEEEFMQLYNSLPKWGGQIDVDIARYVDGLGNWVRA  
SDQWGFESERYFGTKAPEIQKTRWVTLMPKKRAEGVGPEIVDISEL

>Omp8

MSQILHLLWSKFSTSLPSTVTIGSDPQTLQLVHSPAPNVNANALEIRRVNNFLTRCSIRLEG  
TPLDVFDFYNECKKTLLSHYIGIHDSKDVSESWFRRYLSVGVIITTNAYGHIDDKPTRVYICL  
YTALLTSFDDVFEANVEQFGGFNERFMKGEPQEDFLDALARILLDAPRYYGRLATNIIVT  
ATLDFFTGLFLELQARDMTFNEDLHNFAVFCRNLTGIAHAYAVFMFPRDVPFTVYVRSLE  
LKT DINYVNDIMSFYKEDRAEETDNLASILRQVHPSMTKHQVLQKIVDDAVEADVRARKI  
LADYQPALDAYEHFRKGYAMFHVSSGRYRLDELFSYIRFE

>Omp9

MSQILHLLWSKFSTSLPSTVTIGSDPQTLQLVHSPAPNVNANALEIYKIVDNFLSRCGIRLES  
TPLDVEFYNECKKTLLSHYIGIHDSKDVSESWFKRYLSVGVIITTNAYGHLDNKLTKIYIAL  
YTALATCFDDVFEKNVDHMSGFNERFMKALPQGDVFLDAFAKVLLDAPRYFGRLASNIIV  
TSTLDFITSMSVDVLTGKMKFNQNLHNFAMACRNMSGIAYTYAPFIFPKEVPFAIYAQCLP  
DMRIYINHVNDVLSFYKEDKAGETENLASILGQVHPSMTKYQIVQGLADDAEADLRVR  
TVLSQYQPALDAYNCFRQGYVSFHASSGRYRLDELFSFVEPEPIV

>Omp10

MRNFLSQCQIPLQRGVPLDPTFHQECANVLIEDYKPSAAVTLENLPSLMSSFNPFLLTG  
RMASTGYAHLTHTPTRVYVALFTALLVCLDDIFPENVELMCGFNERFIKNETQGEPILDAVA  
GLLRSTSKYFSSLSSNLIVTSALNYVTSLSLDQGLHSIKATEHSRNFARLCRNMSGIPEAFA  
AFVFPPEVPFTAYIQCFPDLYTYANYVNDVLSFYKEDIAGETENLVSILAQTQPNSSRYQVL  
QQLADEAAAAANANIRDILSDQKSILDAYDAFRVGFVQFHIDSPRYRLAELFPCIDG

>ShSTS1

MAHPTTNPSHRLEQMESVREHIPRLQHFLGEIGYRHTTPPAPTLDLHAHHHWIHHVLGP  
MTSWTVAKLNALEDSSSTIFERAYPLSDAEMKFVLAKLTAIAIFLDDSLEDEETYDDIGNFA  
HRVYLGEAQPTGVLTLYHQGIQELSKMHEGDAVFRGLAVAPWITFIDACMLEKRLTTFDSK  
LRVSPRDLGYQRLRNSTDFTSRAPKATPSEVEVSFPIFLRHKSGIGEAYAAAIFKSSRYQEL  
PLSRFVKSMPPDMIYYIELVNDLMSFYKEQLAGETANLIHLQHQS WKGGQGTGPYGSWTL  
LDTF SRLCDETRDAAFRVD ELLRLDECEKIANGELRGEEVGLSPMDVTMAAQWREFRDG  
YVSWHLECQRYKLDFIKLSTFE

>ShSTS11

MAAPESSAWVSSYNLFSDRKRTDFITGSNELLVSHTYPHADYDAFRTCCDFVNLLFVIDEI  
SDDQSGKAARRTGEVYLNAMRDPEWTDGSDLAKMTQQFRARFLRSVGPQSFRRLRHSE  
DYIDCVAKEAEYRERGQVLDMDSFKSLRRENSAIRLCFGLFEFTLGIDLPDSVFEDTFMK  
MYWASADMVCWANDVYSYNVEQAKGHSGNNIVTVLMAARDIDMQAASDYVGEYYAE  
LMEEYMTAKAELASKSFGSRDLDEDVWKYVNAMENWPIGNLEWSFKTNRYFGTLHDEV  
KRTRLVVIKPRKVVV

>ShSTS18

PRHINPHYQEVKKASAAWAESFGAFNPKAQHAYNACDFKRLRTGCDLMNMFFVFDEYS  
VSSPKDVIQQAIIIMDALRNPYAPRPDDEWVGGEVTRQFWKRAIKTATAGAQRFFIDAFE  
SYTQSVVQAKDRHHGFIRDVDSYLEMRRETIGAKPSFVVLQMDMTLPDEVLAHPVIQQ  
LSALSTDMICLGNRRLIQILWTVQDICSYNVEQARGDDLHNIITIAMNQFDIDIAGAMDWV  
VKYHAKLERKFLYLYNNGLPSWGKELDPQVERYVCGL

>ShSTS15

MVRSPVSDKFCIPDTLASWPYPRILNPHYAEEKAASAAWTKGFGAFGPKAQDAFDRCDFK  
RCRSGCDLMNLFFVIDEHS DTHGEETVRKMKDVM DAIRNPHKPRPNDEWIGGEIARQF  
WERAMCYASEISQRRFIDTFDEYLESVDQAADRDSARIRDIESYINIRNTIGAKPSFVIM

EQGMDIPDNVFENEVFQRLRMATIDMLCLGNDIVSYNIEQARGDDSHNIVRIVMNELDTD  
VPRAMDWVAQRHTQLEREFFTALSELPTWGEPIDGWVKEYVYGLGNWVRANDQWSFES  
QRYFGTKGMEIMKSRWLSVLPKVRPAEVGPQLVDQSLL

>ShSTS16

MAVATSVATPVPTPAYSAGRAPAKEKKIYLPDTLAEWPWPRAINPHYAEAKEESQAWAASF  
NAFSPKAQHAFNRCDFNLLASLAYPLATKHGCRSGCDLMNLFFVIDEYSDIAPVEEVRRQ  
KDIVMDALRNPHKPRPEGEWVGGEVARQFWALTITNASAQSQKHFIETFDEYLDSSVVQQ  
AEDRSERIRDIQSYIDVRRNTIGAKPSFALLELDMDLPDEVLAHPTIQSLSLATIDMLCLGN  
DIVSYNLEQARGDASHNIITIVMNELNLDVNGAMRWVGDFFHKQLEKQFFAFNNLPKWG  
NAELDAQIAVYCDGLGNWVRANDQWSFESERYFGARGLEIMETKTLAMMPIQRTEALGP  
QLVDDDSIL

>ShSTS3

MSTAKPEIPPMESFPPINVYPREAEIHKYCNNYVAEHFPFNDAEVKHFNGMEIPAYACRVV  
SFARDHEKMRKVSVILIVFYFIFDDWVDKNGMKLKDSTVMALLPPPSEVPIKPPQAGKMTL  
SDISAELYGAVRDDMPKADYDRMVNDMMEYLRVQRMAGYNTLQELDLRSGEVGVY  
VLFRIIYAMELSVSGKELDDPLVKRAQVLGSEAGVLRNEASSYVKEVNEGSGAHNVITK  
LQEWSGCTEKEAMKQVLDAIEKRQEELREMCLKVTEAPHLSEDCKTFVKTIPIYVAGNT  
WWHHHSTRYAEGREVTVP

>ShSTS4

MSETKVGVKVPFPPLPGAPYPPVRNHPRWKGAPAADFDRMVWGARIAGIFFLADDYIDSG  
KMLDRIPGFKAVCTFLPLHKEDQAEICHDIVFRAIKATSHPRTFDQLTKCTHEWWDNSIHE  
PFQNLQYLAVRRVNIAMVTYFRYTLNLTDEQVNHPLMREAEGIVSDHVGLTNDFFSY  
LKEKMTNSDDTNIIRILMDHEHLSYEEAKTVIEKKIRQKEQDFIGAGMAVLNDPELGKDRE  
IYRWIANLQYCMGGNLAWSQEVSENHYGIHVLDIT

>ShSTS5

MELSSLRPFPAFVLPNLANITRQAFNLKLNPHSQSANSAMKSWFKSFHVYDEQKSREFLE  
AGKFDLYAALSFPDADLQHLETCLAFFFWAFSTDDLSDEGDLQSKPEEVQVGVDISTSALS  
SHAPTSLDFPYAAMLQSLFNRIKTATKGASERFIQAFKDWSSSQVMQSRNRSKLLPSVE  
DFILMRRNTIGAALVEAMIEYSLDLDPDYVFRDPVVIAMSEATTDIMTWPNDLCSFNKEQ  
ADGDYQNLVCCCLMAQYDLGLQDAVDRLVGMISTRVRDYITLKEQLPLFGAEVDTMLRKY  
HAALAHYVQGTIVWYYSSPRYFHGEQIIEKESTRIILFSKASSKDCS

>ShSTS7

MPHSTVHSHTLISDDSVLLFPDLISYCAVPLRVNPYGRSVADDSERWLLNGAHLSDKKRK  
AFLRLRAGDLASMCYPDASAKSLRVVADYMNYLFLKDDWTDEFEAEDVDGMRDCVLA  
ALRDPLHYETDKAVGKLAKSFFGRFVQHGGPLRTKRFIDTMVLFFRAVRQQALDRYDDI  
PDLESYIALRRDTSGCKPCFALIEFAGGYDLDPDAVVEHPSIQILQDATNDLVTWSNDIFS  
VEQSRGDTNMMVVVLMHEQGLAVQEAIDAVADLCERSIDTFEQTRRSLPSWGPVDSNVE  
SYIDGLQNWIIIGSLHWSFLTERYFGKDRRDVVRKLFVKLLAKRC

>ShSTS8

MPAIIRQFILPDLFALSSAFPDATNPHWKRACTESRDWVNSYRVFSDEERRAFFTQGGQSELL  
CSHAYPYAGYEQFRTCCDFINLLFVLDEISDEQTADGAWATGRIFLQVLQDPEWDDGSKVA  
QMTRDLRARVVSTGVKPHTRRLVHMCRDYIASVVEEAGLRERGEVLIDIESYIELRRNNS  
AVLTCFALIPYILGIDLPDEVVNDPNFSALNLAAVDMVCWANDIYSYDMEQAKGLEGNNI  
MTVLTEMHGLTMQDASDYVGEQYKALMDLFLDNQAALRSFGPSVDADVRRYVDAVRH

WPRGNLSWSFETPRYFREKREEIENTRVVILRPRPEPKMKSQN

>ShSTS10

MGATSTTQIPHSTSLESYILPDLLRLSSPFKASMNPHWATTASESSAWFSSYSIFSQDELTEF  
AVCKVELLVAYAYPHANYETFRGCCDFMNLIFAIDEISDMQNGEDAGETGDVFLNALRDA  
EWTDGSALEMTDRFRARFLRSAGPQSFRRLKVSSEDYIDCVTKEAGYRERSQILDMESF  
KHLRRDNSGVPLMLGLLEYTLGIDLDPVVFEDTALSRIYWAAVDMVWWANDVYSYKVE  
QAKGLAGNNILSVLMAAKNIDLQDASDYVGDVYAGLMKEYTEAKAELVSKSFGSKELD  
AAVKKYVDKMENWPIGNLEWSFASMRYFGSQSGEIKRTRTVMLRPQDVL

>ShSTS12

MQTPPSCESYILPDLLHISQPFKASTNPHWLKAAPESSAWVSSYRIFTDRKRMEFILGSNEL  
LASHTYPQANYDTFRGCCDFINLLFVIDEISDDQSGEGARLTGKVFLNAMRDPECTDGSIL  
AKMTRDFRARLLQSIGAQSFRRFLKILEDYIESVTKEAEYREHGYVLDMEQFKILRRQNSA  
VRCAFGMVEHTLGIDLDPVVFEDATFMKVYWAVIDMVWCANVNMFPFPGYLIQDVYSY  
SMELAKGDNHSANNIMSVFMAANGVSLQAASDYVGRHYARLMEEYLSARAEASKSFG  
SQELDSDVLKYIDAMENWPIGNIEWSFKTSRYFGPQNDEVKQTLVVKLKPQEVPA

>ShSTS13

MPDLFTAWPWKTTRNPLYLEAKADSDGWLATFGDFFQKYKDCILDCDGKRLRCAGDVN  
TLLFVDDILDYEDDATVKERMRLMDAMENPFKPRPDGEWIVGEMTRQFWERTIKVSN  
TLSQERFMEGVRDCMAGMVRESLARKASRQHDSIHGFLKTRRDSAGCNLVFALSELEVA  
VPAEAMKHSQIRELIAIQDISCIANDTFSYRREQSRGRTEDENIITVVMNNLGTDPGAIDWV  
ENHHKELMKEFIEKHDKVPKWGEPTDSKVKNYIESLAGWVWANARWSFECRRYMGDEG  
MEIMEKSRWVRAIPKERI

>ShSTS17

MSQTYTIPDTLANWPWKRKINQHYEEVKMESASWARSFHAFSPQAQDAFDRCDFKRLRT  
GCDLMNLFFVIDEHSDLSSVADAETQAQIIMNALMNPEKPRPHGEWVGGEVARQYWELA  
IKTATPKSQRRFVAADFDDYMNNAVQQAQKDRTHSTIRDIDSYMEVRRKTIGAWPSFALLELD  
MDLPEDFMDHPVMHELHVLSSISMICLGNVSDIAPLPSDIVSWNLEQSRGDDTHNIVRIVM  
NQLDTDINGAMAWVEMYHKELEVKFMDIFTKSQEWNKSMNKDISRYVEGLGNWVRAN  
DQWSFESKRYFGDRGLEIMSKRTVSMMPKRNDVLNGTQLDIGPVIVDGSIL

>HS-HMGS

MSETKVGVAPFPPLPGAPYPPVRNHPRWKELYRLHDEWMMKYWPFSSSEKKRARIPFMN  
LAGFSTWCAPAADFDRMVWGARIAGIFFLADDYIDSGKMLDRIPGFKAAATGTGPLHKE  
DQAEICHDIVFRAIKATSHPRTFDQLTKCTHEWWDSDNIHEPFQNLQYLAVRRVNIAMYFA  
NAYFRYTLNLTDEQVNHPLMREAEGIVSDHVGLTNDFFSYLKEKMTNSDDTNIIRILMD  
HEHLSYEEAKTVIEKKIRQKEQDFIGAGMAVLNDPELGKDREIYRWIANLQYCMGGNLA  
WSQESGRYNVGVIDGISFPSLSYAAEPTPEDEVDDTEESRLRELIFNVKDIPPPDFTIDDDA  
IFMTNPHSHLQDNVVPLPRPENVGIIIGLEVYFPKRCISIDALEDFDGVAKGKYTIGLGQQYL  
AFTDDREDINSFALSAVSSLLEKYNIDPRSIGRLDVGTETLIDKSKSVKTTLMDLFAASGNH  
DVEGIDSKNACYGSTAAVLNAVNWIESSSWDGRYAIVFAGDIAIYAEGPARPVGGAGAV  
LIGPDAPLVLEPTHGSYMANITYDFYKPRMESEYPVVDGPSSVTITYITALDESFKAYQRKV  
QEGSSRDVPPPYANGANGKASATKSVKLSDFDYSVFHSYKGLVQKAYGRLTYHDFVAHP  
TAPVYRDLPTDILSKDASATLTDKSVEKTFAAASASMYKQVVTPSLLISNRCGNMYTGS  
GLASLLTSIPSYELFDKRISMFAYGSGCASTFFAIKVRGDTSHIKAKLDLERRLAEMDVRP  
CEDYVVALKLREETHNAPSYIPNDSAGLWPGSYRLEAVDGKYRRSYTVTH

>CpSTS1

MPAAIPKFYTLPDTLRNWPWKREISPYRQCQAESVAWLESFRPFSPKAQVAFNKCDFSLV  
SALCFPKGSPYNLRSVCDLMHTFFTLDEYTDYLDLEGVKTLCATMDAIRNPDKPRPEGE  
HFIGEVARQFWARARVNATPACEERFVKSWRTYLNQSVIQAERRDAKYICTMEEYLHARR  
DNIGSDPSFALLEITLEVDLPHEVMEHPTIVALARDTTDMIVLANDMCSYKKEIHADDANY  
NAVTVVMHNTNVDGGIQWISDYHDTIVDHFLRLREDVRLKQNGFPSWGARIDREVEA  
YVEGLGLWIRGHDEWNFGSGRYFGDEGLEVQKSRIVECTVSADPFTPFLIQEEEEVDENA  
A

>CpSTS2

MMQFYLPALVEQCPIEGGTNPHYEQGAAESRAWINGYNVFTDRKRAFFILGSNELLCSHV  
YYYAGSEEFRTSCDFVNVLFIFDELSDEQTGKDALETGQIFLNAMKDERWDDRSKFSSMT  
KEFRKRFLRRSGPRGTARFLKHWETYCAAIVIREAELREMDEVLDLEDFINLRRENSAVRL  
CYGLIEYCYGIDLPEAVYEDSTFMDIYWAAVDLVCWTNDVYSYDMEQSKGIAGNNIVTVL  
MRNRNMSLQQASNYIGQHCETLMDRFVSSQVRLPSWGPVVDREVRLYIQGLGAWIKGNL  
DWSFETQRYFGPMHEEVKSTRLVTLRPRERIEECSDSDSDSDFE

>CpSTS3

MVATTASTQPDHFVLPDLVSHCSFPLVYHTDGDRIAAQSVNWLDNSNCPDLNAKQRVLRG  
LQAGELTAFICYNTCTPERLRVVSDFMNYLFHLDNISDGMMTRETDLADVVMNALWFSG  
KYMPTKEQSADELNPGKLARDFWARCIPDAGPGCQARFKETLELFFEAVNIQARARDDD  
VVPDLESYIDVRRDTSGCKPCWALIEYALDIDLPDFVVEHPHIEALNQSTNDLVTWSNDIFS  
YNVEQSRGDTHNMIVILMKYHGHTLQSAVDYVGDLCQKTIDDFQANRQKLPSWGAEVD  
EMVQRYVVGLQDWIVGSLHWSFQTHRYFGADGANVKKNRIVKLLPLKA

>CpSTS4

MSESNQHLRIPHTLTAWPWPRTLNPYYQTVKAESSAWLESFKAFFDPKAQAGFNSCDFNLL  
ASLAYPLASKEHLRTGCDLMNLFVIDEYTDIEDEVHAAMVASVTMDALRNPFKPRPRGE  
IIIGEIRARQFWARTVPTITEASHRRFIETFDTYLQSVVVQARDRSKQHRSIQDYLMRRDNI  
GAKPSFAILELSLDLPDYVMSHPSIQTATVTAIDMLIIGNDLCSFRNEHARGDDTHNLTAR  
HEFGQGLGHAVNWIESYNKSLRRSFLSAIERVPSWGEEIDTQVAEYLYGLANWVRANDC  
WSFESHRYFGKHGREIQVHRVVDLACGHPECVQDNEVEKPAKGLLYEVEKKTYVGP  
LQVNTKDPIAFRSDPFLSARPKDITSTPTRLTCVALLCTLSTFIGWLVLK

>CpSTS5

MSTIATGVALKSTRRPTKFILPDVSHCTFKLRCSRFRQKVTTETKQWLFKGGNLGAKDRV  
KFHGLKAGLLTAMTYPGAAYPQLRVCNDFLTLYLFHLDNLSDDMDNRGTHTVGNVVMNS  
LYHPHTYNEPERVGKMARDYFKRVIVTSSTGAQQRRETMDFFFQSITEQALDRKNGVIP  
DLESYITLRRDTSGCKPCWALIEYAYNLHIPDEVMEHPLILSLGEAANDLVTWSNDIFSYNV  
EQSKGDTHNMIPVVMNQEGDLQSAVDVFGQMCKQSIDRFVEDASNLPSWGPEIDRDVA  
VYVNGLADWIVGSLHWSFESERYFGKTGLEVKATRVELLPQRA

>CpSTS6

MLTTPYFTIPDLRNWPWKRVLNPHQKVCEEEAADWMRSCGAFTPKSQNAFDRCSFGLL  
GSLAYPRLGRDGLRIACDLMNMFFVIDEYSDVASGREARLQADIVMDALYNPLVPRPVE  
WIGGEVTRQFWANAIAKTATPSSQRRFVRNFQRYVDAVVQQAQDREAHCIRDVKSIFILRR  
QTIGAIPSLDLLTLEMDLEDEVLDHPHIAKLELCVDMILIGNDLYSYNVEQARGDDTHNFV  
RIVKDERKCNLDALRWISDYHDLADEFLNLMHNLPFGSKLIDEQVKTYVDGLGNWV  
RANECWSFESERYFGKKGKLYQKSRRVRLLPSSIALQGQNIQAAVEISDLPAAGIIV



>CpSTS7

MTTSGFRIPNLVVAWPWLRAVNPHMDQTSQNSSSWLENFHAYPPATQENFNRCDFGLLAA  
LTYPIASKEHLRTGTDFMNLLFFIDEITEIGDETSTEVLYIAMDALRNPSKLRPKGEHVVG  
EITRQFWERSIPHITATSHRRFVCALEAYLKSNVVQARDRSSQHIRRIEYFSTRRDNIGTKP  
AFVLLELGLDIPDCVMTHPSIQSAVTSLTDMLIANDVFSFKVEHSRDDDANNVLKVVMCE  
LRCNLARAIEWADERNQQLRTTFLSSIAEVPSWGGQVDIQVSEYLYGLANWVRANECWS  
FESQRYFGTHGPTVQKDRWVSLDCGHPQCITGGTTTPRTSYRPYLVGMLGIATYALSQYG  
LMSRATLLRR

>CpSTS8

MSNTFIVLPNLEETVYSAFPDHGLNPHYDAVCPHSRAWIKSYSDPIFGPKMRDFMEKCDFE  
LFAAYICPRASPEALRTSMDITDAEDSVTVKKAIAIVVRTLQDRSFDDGSWICRLVKEFLD  
LHVRKKAGPNVSRRFVGHFVDYVVRVSDEATQRRERHEVLDIEAYVERRRESGAIRLTFDLI  
ESGLHIDLQPQYVHEDPAFIAGYNATMDLACWVNDVYSYNMEQAKGHEASNILTVLMKYE  
HLDLQAAVEYVAKHCEVLAAQFIEAHANLLARSDPNFSEDAARVLDALGDAVIGNDRWS  
FETERYFGKDYKAVKQSRIVKLAGRAEGKHALRN

>CpSTS9

MTVLQFVFSVFTSSKPQTFFLPRLDETFKVLNNGLNPHFSTVRPQSRRAWIKQYDGEVCGP  
KMRAFMNDNCNFELSNAITYPYAEPAGLRAAMDLTNINLWLYDEYTDTEGASAERAAVIV  
NRALKEPGFNDGSWICRMMQDFRRRHIDKAGPDVARRFITNFCNYVDRVAREAILREKNE  
VLDIPSYILFRRETSVAVKTCFDIVEYCLGLNLPQYVHDDPVFVSGYNAAMDVLFWANDLFS  
YNMEQAKGHSGANIVTVIMKSKRVDLQTAADFVAGYCEALTAQLLEAKQILSSRSDPAYS  
KDAVRVLEAFGDWVRGNDDWSFATERYFGKENNAVRRESRIVVVRAPFDETVKLVE

>CpSTS11

MSQKSPSTFRIPDLEAIFSAFPDEGTSPYYDDVLPEARAWIKLYQDQVYGPKMTEFIDRCKI  
ELITYYVHPVASRSCVRAMMDLHNLFWLYDEATDVQSGQTAQETAKVVRNSLTSPEFND  
GSWLCEMLQDFRKRHLDGVRSSSFVARFIEHFCFYTDRADEAIYREKQVRVDIPSZYMAFR  
RETA AVRVMMDTVEYCAEELPRTVLDDPVFQVAYDAALDLAFGTNDIHSYNMEQSKDH  
SGANVITVIMKERGLDVQGAMDYFGGYCEALTAQFLDAKRKIEKREGQEWKDAVLILDG  
YTHFLTQVVRWGFATERYFGKKNKEVQETRVVELRAPFVDHVDLAD

>CpSTS12

MESLPVTLVLPRLDDIFDDLNNVNPVNPYSIACPASRLWIEQYGTQIYGPKMQAFMNNCN  
FELSTTYTYPYADAKRLRATMDLVNINLWLYDEYTDTRASGAHAKEMASIVYQALSGQQVA  
ANSWVGCMMDQDFYRQHIEKAGPNTSRRFVDHFQRYAQQVGEEASLREQRQILNMHEYID  
FRRETSGVRSCFDLVEYCLGIDLPQFVHDDPIFTMGYNAAMDVLFWVNDLYSYNMEQAK  
GHGAANVTVIMKSKSLGLQAAVDHLADACEVLTAQFLEAKSRLSKHPESIFSKEAVKVL  
DAYGDWVRGNNEWSFVTERYFGKENKAVRQSRMVKIKTPFGEMAPFSGRKNYL

>CpSTS13

MPQDPPTTFRIPDLETIFSVFPDEGTNPHYDDVFPEAREWILRCKVELLTCYIYPSASKSRLR  
SMMDLYNLFWIYDETTDVQTGQEAQVVRNALTNPDFSDDSWLCAILQDFRRRNLD  
GIMSPGFVLRFDHFCDYANGVADEALFREKDLMLDIQEYLFKFRREAAVRVVLDSVEYC  
LDLELEQNVMDDPVFQMAYNALDLAFGTNDIQSYNMEQAKQHKGANIISVIMRARTLD  
LQGAMDYFGGYCQALTAQFLDAKCIIEKRVDRPEWKDAVRILEGYGCFLAGQVRWGFTT  
ERYFGKKNKEVESTKVVELRAPFVDHVHISD

>CpSTS14

MNVMNTPITTATMPVSPPCPNPDPTFQTRLSARWHPSTAEIVPKVRQYIVQNW PWSSEESK  
RRYLTGNAEDGVMYAFPGVKNDRIEAVTTWLALHFLIDDYILESVD SAASGLDPGKKKE  
AIQRLFGIMRRLVRPNVNNPVEVMVDHVASSFLSCSSEDEVAQRHARQILESTIQFITAAEN  
GDGKATAMGDLNSYLAYRMVEAGVFLSLDLAFWGGEIYIPSHISNDPQIRSFFKLVSDHLV  
LVNDIYSYKVEQDRSEGVGGAFNAVSVLMRSKHVDAQDAMGIIKTQLTTLEEATLEEAAV  
LRDRYAEKGEEEEVVDKMIQTILEMMAGNCEWSKFCGRYNSSPVSDEASVGTDRALEQG  
TTLSLS

>CpSTS15

MSSHRPTQQPNPLVDPPDFVSKFLAHDREDRDEIITSVQAYFLAHWDWPSPTRKAWYSKA  
DLEDWTTLMCPAGPSERAWAFTAYVTFWFLYDDLMEIMGPEELGSSIPRIARILHGEEGLE  
DMTTPEFILKEICLKINTIAPGKRIFEATLVYMKAATAKQERLQSLTLGFDAYLK YRMLDAA  
CWLTLGAYWVQEITIEHLKTEKIWLLQELSLFHGILINDLFSYRKEVKASSQEVQDHDK  
TLYNGLVILMQSYQFTLLEALEEMKKKIWDYEDFMAVLDDVRETHKSSAEDREFIERLA  
VALMDVIGGNVAWSACCGRYNRL

>CpSTS16

MPLPVTFRLLPDLSSIFSIFPDLGINSHYECTYPESREWIAQYHTGVYGPKMRDFMERGKIEL  
LGAYTYPYASKERLRFVMDLHNVS WLFDESSDVKTGQQAGVTAVVFRRALIDPEFNDGS  
WLCHMLKDFRQRHLDNVMSHAFVEMFIRDFIGYADGMSAEACYRDLNKVLDIAGYVKL  
RREAGAVRLALHSVEYCLEKELPSYVREDPAFVIAYNGALDLGYIVNDIHSYNMEQSKGH  
GHHAANIVTVFMEAQNIGLQAAMDYAGGFCHGLVLQILEAKELLAARSDPVFSNDAVKV  
IEGCINFFKGQDIWDFESERFFGKSKDAVRKTKVVNLRALFEDSVNLNE

>CpSTS17

MNSDLQSTLASLDTTYTCRFRARYHAKSEQVMTVVQDYFVKRWPWRSEQAKQLYIKTN  
LEEATCICFPTTLDDRIETVVTWFCYMHILDDIIEGLEANKATKLVDRLSNILGTLPDPED  
RLGVMAADVCSRFRLLGENDGEEKHGLDIISESCKLLRHTSSADSKLQSLSTYDTFIEWREL  
DVGLWFSTSLFLWGCGIYMRLHMSNDPEVRQLLRVSGRHIAVANDLFSYRVEALRAGQTS  
QILLNTIAIIAKEKQVDPQTAMNMTKQRLSEMEEEVEVLIGKLRDRYTGEEGELIERLFFV  
CKGMMAGNCEWSSICFRYNGAQRVAVA

>CpSTS18

MVHWNHPPTFVLRNICDITGRVFELKENPRIAEANS AVLKWF EQFN VYDKKKADKFLNV  
GKFDIFAALSFPEADLEHLTTCLIFFLWAFATDDLSD EGEFQS QPDQVQHGHDISCSILDDD  
DAPQPDYPYAAMLWDLRLRLSTGHMGM YKRFKQAF LDFSSSQVQQSTNRNVDRIPPVD  
EFILMRRTIG AALVEAMVEYSLDLIPS YVWEHPVIVGMSQATSDIMTWPNDLCSFNKE  
QADGDYQNLVCVLQHNHGLELQE AIDLLTKMISDRVQDYVDLKNQLPSFGPDVDPALHT  
YLTAEQFVQGTVVWYYSSPRYFRHLDPRGKPEVLIHLFPKTDAPTLPVVVQEKS RPFIER  
EIYLP AKRLLGVFVNYVAITVFGYSVYRLYGDS

>AcTPS4

MSAQQTLPDLLAVCPLKDATNPHYAQA AAESTAWVKSYNIFDARKLAFLLQGSSELLVS  
HAYPYAPYEQFRTCCDFVNLLFVVDEVSDDQNGKDARRTGEVYLNVMRYPDWDDGSAL  
AKMTREFKQRLLA FAGPN SYRRFLMH CDDYVNAVAREAEYRERGEVLDIDAFQTLRREN  
SAIRLCFGLFEFALGIDLPDFVFQDPHFMTLYWSAADMVCWSNDVYSYNMEQAKGHTGN  
NIVTVLMRQK SIGLQEAADLVGAHFSA LMGRFVETKKQLPSFGAAALDDAVAKYVAAME  
HWVIGNLEWSFESQRYFGAEHTRVKATRVVVLSPADEN

>AcTPS5

MAVTPAPVNGSDSTKEILKFPDFISPIPYPLRCHPQEREVSRQSEEWLLSMANFSEKQRAK  
FLTLNAGLLSGWCYIDCTFDELRVCTDFMNFLFTLDDWTDEFDTTGTRGLAECVMNTLYF  
PDTYKSDTAHRLTKSFWERM RATAGPGCQQRLSTLDTYFQAIMQQAADRGSRNIPDLE  
EYILLRRTSGCKTGFAFIEYAANIDL PDEVIEHPIIKAMSDSTNDLVSWANDVLSYNAEQS  
RGDTHNLVLCVLMHQNNVDRQEAIEQAGELWRKTLDYDFECHKALPSWGPEIDRAVALYV  
QGLDDWIIANA EW SFETER YFGKEGPTVKKTRQIPLL

>AcTPS7

This sequence is not available.

>AcTPS9

MSSPSSFVLPDLHAVTPFKGSFNPHYPEAAAESSEWVNSYKVLSDKKRAFFLQGGSELLC  
AHAYPYAGYQQFRTTCDFVNLLFTVDEISDDQNGKGAYETGLTFYNAMSNPAYDDGTVL  
CKMTKEFTARLLEHCGPQTYRRFIKHCKDYIEAVAVEADLRERGEVLDLEAYQTLRRENS  
AVRFCFGLAGYALGIDL PDEVVEHPAFMAMHLSTVDMVCWSNDLYSYNMEQAMGHTGN  
NVITVLMQHKGLDLQGAADYTG VHF KGLIDTFLDAKRSLPSWGP KLDGEVAQYAMAME  
TWVIGNLNWSFETQRYFGHARHEIKRTRVVQLYPRRIVEESSDEEDN

>Tps1A

MSPRYSALLKVL CRMPGSLDGFVSIFRRFMQDPLGIRYHLHTLLLFTWADMKTILLPITAF  
ACSTAPLHSFSNLVQGMIIWLHLQLLCNVSNQARGKSEDALNKPWRPLPSGRLTEPQAVI  
LRWITVAVCLLLSATYGRDLLMTTVGLILTLLYDELGMASHHIGKNLCNIGGYTTIEVGAT  
KLMGASRDL DYVSTVAVIISGVLI FTTIQAQDFPDIEGDAALGRVTFPIYAPEFSRIFTFIVMP  
AWSIFLGWFWDIGVISRMVFAALGT YVGLRYYLWRTVDIDKRSYVFFNAWLTLAHILPLS  
VRTGFLAF

>Tps2A

MASKRTFPVISIRPLLSLCFSALRNWIRTLILFTYTDYKTIVLPVSVFACVSAPVHSFVRFLH  
AVLWIWLHLLQCNVSNQYRSVLEDAVNRPWRPLPSRLISVEHACILRWLLVPLCIGTSLCY  
GWDVALASACLTLT TVCYDELGLAGHFLGKNLCNVPGYVSFEIGATKIMGSTTNLDFIALE  
SILCSAMVIFTTIQTQDFPDVAGDRALGRVTL PILCPEGSRHFTTCVLLFWSGFLSYAWSIGL  
LSSAVLISLGIWVAYRYRFRKVEEDKKS YLIYNIWLLFVHSLAAHARWNL MAL

>AncA

MRRNVLNKATHSQSPLKPNITTLIFDLGDVLLTWSDSTPKSPLPPKIVKGILRSLTWFEYEK  
GNLTESQTYGQVAQEFGVDASEVKASFEAARDSLKS NPMLLQLIRSLKDSGHVIYAMSNIS  
APDWEFLKTRADLSDWALFDRVFPSAEAHDRKPNIGFYQHVINETGLNPSNTVFVDDRIE  
NVVSARSAGMHGIVFDDINN VIRQLKNLCEDPIHRARSFLYANKKCLNTVSTDGTIVSENF  
SQLLILEAIGDESLVDFVRHEGRFNFFQGEAKLIMTNHYPDDFDTT SIGLTVVPYIDDKTRN  
RVMDEILAYQSEDGIVLVYFDHKRPRIDPVVCVNVLT LFYRYGRGHQLQKTLDWVEQVLI  
NRACASGTFYYATEEQFLFFLSRLIQSSPDVRQRLEGVFKRRVVERFGADGDALAMAMRI  
HTAASVGLVDHVDL DKL FALQQNDG SWRDSAFYRFPSARQLASNDGLTTAIAIQAIQAAE  
RLREDGNVL

>AncC

MRRNVLNKATHPQSPLKPNITTLIFDLGDVLF TWSDSTPKSPLPPTIVKGILRSLTWFEYEK  
GNLTESQTYGQVAQEFGVDASEVKASFEAARDSLKS NPMLLQLIRSLKDSGHAIYAMSNIS  
APDWEFLKTRADLSDWALFDRVFPSAEAHDRKPNIGFYQYVINETGLSPPNTVFVDDKIE  
NVLSARSAGMHGIVFDNINN VIRQLKNLCEDPIHRARSFLYANKKCLNTVSTDGTIVSENF  
TQLLILEAIGDESLVDFVRHEGRFNFFQGEGLIMTNYFPDDFDTT SIGLTVVPYIDEETR N

RVMDEILAYQNEDGIVQVYFDCKRPRIDPVVCNVLTIFYRYGRGHQLQKTLDWVEQVL  
INRACASGTLYYVTEEQFLFFLSRLIQSSPDVRKRLEGVFKRRVVERFGADGDALAMAMRI  
HAAASVGLVDHIDLEKLFAMQQNDGSWKNSAFYKFPSARQLASNDGLTTAVAIQAIQAVE  
RLGEDGNVL

>BvCS

MSTASSPSLVASEIDSPHHSRTSSPSPTLSPPTSFILPDLVSHCNFPLTYHPAGDEQAAASLAW  
MLSFVPHFTPCKVAAMNGLQAGELTAYCYHDCPPERLRVVDDEFMNYLFHLDNISDGMM  
AKNTTQLADWVMNAFEWPEKFQPTVNADGEVVEEIAAVKLARDYWSRCIQQAKPGVQQ  
RFKSSMNMFQAVEQQTNDRDGQVVPDLESYIDMRRDTSGCKPVFDLIEYALGFELPEEV  
VDHPVIKALNQDANDLVTWSNDVFSYNVEQARGDTHNMICIFMEHDGCTLQEADRGG  
LCKQTIDAFVENKARVPSFAHLGPEVDAWTTGYVQGLQDWIVGSLHWSFMTKRYFQEAG  
AEVKKTRFVKLLPIEEGRHKHIPPIYASAMVAATA

>GME3634

MAVTPANVASPDSQEIVLKFPDFISIPYPLRCHVQEREVSRQSEEWLLSMANFSEKQRSKF  
LTLNGGLLSGMCYIDCTFDELRVCTDFMNFLFTLDDWTDEFDTTGTRGLAECVMNTLYW  
PHSYQADTAHRLTKSFWMKQTAGPGCQQLMSTLDITYFQAIMQQAADRGSHNIPEL  
EEYILLRRDTSGCKIGFAFIEYAANIDLDDVIEHPIIKAMADATNDLVSWANCPFVQRTVT  
RRHAQPRLCSHGSRPRPAGCDRAGGRAMGEDPPLVLRVPQERPFVGLRDRPCRRSVHPG  
ARRLDYRERRVELRDGALLWQGRASREEDAAGYTASGPYSC

>GME3638

MRARSFILPDLVSDCPYTLRCNSNCEAVARASEAWMLEDANLSPKRRDAFLRLRGGELTA  
ACYPDTDEACLRVAADFLNFLSLDDWSDEFMEDTCGLAQCVMCVLHDPDDFQTEKAA  
GKLAKLFQSVPADGGAEVYSSIHRYGPLLSCDCTASPGPRVRVCSLTRRICGPPRGHERVQ  
ALLRSHRIRRGYGPSRPRRPSSNNHRPRAGSQRVYIMVERSLLVQRRASAGHTQHDCGDH  
ARGRAQLARSRLGRSLQALHSALRGKPSHAAIVGSGD\*RGSRQVCARPPGLDGRCPPLE  
LRHRTLFRGRPCDQEARCRDTTTAEVFI

>GME9210

MPLSSSVVAFRLPDTLGCWPWRRCLNTHYVEAKQDSASWLESFHPFGPKAQRAFNMKCDF  
TNCVQGVTTSSSSSTLMSRTRRRSSSSRTSSWTHCETLTSVLQENLSWAKSLGSWARTI  
KVASEPSQRRFIETFDYDQSVVQQAADRSQNHRLDVESYLENRRENIGAKPSFALLELD  
MNLDPDEVIEHTIVNLTTWAIDMILGNHCLVQRGAGAWRRRTQRRDHRHASLQRRRAGC  
HGPHRRVAPEAGGPVPHQLQQAAVVGTRDRASAVHPGHRKLGTRERRMEFREREVLWIE  
RTRDRAESLGNPTPSGLRGEACGC

>Agr1

MCASATRPQPSASNNVKKIILPDLVSHCTFKLRHNRHRKQVTTETKKWLFKDGNNLLGQKE  
RAYHGLKCGLLTSMCYPDAGYPQLRVVNDFLTYLFHLDNLSDEMNRGTTTTADEVLNS  
LYHPHTWRSSARVGKMTRDFYKRLVLTASPGAQQRFIETFDFFFQSVTQQALDRASGVIPD  
LESYISLRRTSGCKPCWAMIEYANNLDIPDEVMDHPIIRSLGEATNDLVTWSNDIFSYSVE  
QSKGHTHNMIPVVMYQEGLDLQAAVDFVGDMCRQSINRFVEEKARLPSWGPBKIDQDVAI  
YVQGLADWIVGSLHWSFETERYFGKSGRQVKASRIVDLLPRQLP

>Agr2

MVWDFVLSLFHSLLAFAQTLSWLTGSFLFNNKMAPAPNPAPVTFILPDLEKTFNSLPDDG  
LNPHHDVACAESREWFAKYNNKKVLGAQMQEFFFFRCKFELITSYTPYVDKEGLRATMD  
WHNILWFFDEVTDDETGTGDAHKSIIITIRTLREPFDGSSSLCRMVRDFRLSHLSRAGPEC

TRRFLEHCDVAFHAGAVEAELREKGEVLSIEGYLKLRRETSGARTCFDMAEYLMIDLPQ  
DMYDDPVFQKGYIAALDLIFLANDLYSYNMEQAKGHNGANVLTVMKETKLNLSAAD  
YVGVLCCLKIKQFQEAKSTLENRLAKEKNPAKAAALKDAIRSLVGYGHWVRGNVEWSFE  
TERYFGKKNKEIKKSRVVTLTPTNSVNRALKA

>Agr3

MNASPFLNESSPTRPTSFVLPDLVSHCKFPLSYHPNGDEIAQESVDWLDSSCPDLTAKQRR  
ALRVLQSGELTAYCYNQATSPERLRVVSDFLTLYLFHLDNISDGMMTRETDLADVVMNAF  
WFTDKYMPTRGPGKEQLDEELNPGKLARDFWSRAIADCGVGVQARFKETMGLFFEAVNI  
QARMRDEDITPDLESYIDVRRDTSCKPSWVLIEYALGIDLDPDHVVDPHIMQALNQGTND  
LVTWSNDIFSYNVEQSRGDTHNMIVILMEYHGHTLQSAVDYVGELCAQTIDTFCENKERL  
PSWGPEIDDMVARYVKGLQDWIVGSLHWSFQTQRYFGKDGLDIKKHRFVKLLPLEAAK

>Agr4

MSALPSQFKLPDLLSTCPLKDGTNPAYKKAASRAWIGSYNMFADRKRAFFIQGQNELL  
CSHVYCYAGYEQLRTTCDFVNLLFVVDEVSDEQSGEDARATGQVFNAMKYADWDHGS  
KLAKLTKDFRVRFLRLAGPKNVARFVALCESYTACVGKEAELRESGQVLGVKEFIPLRRQ  
NSAVLLCFSLVEYILGIDLDDEVYRDENFLNAYWAACDHVCWANDVYSYDMEQSKGLSN  
NNIVTVLMEENHTSLQDTSYIGEKCAEFVQIYLTSSKKRLSPSLGPDAALFLESIGSWMVG  
NLAWSFETSRYFGSRHLEVKETGIVILRPRELPELGSSSDSDEE

>Agr5

MASSLLEPSLAAIALVILLASVSLSRKKRPAAPEPQGLSVLGNLFDIPKRASSIYLALGKPY  
NTLTKRAVSQQLQGYTPGSHIDATSHSPRVFRLPNLEETFSVFPDHGLNPNYTSARTDSRAWI  
NQYTKVVCGPKMVAFMNNCEFELSNSHCYPYAGYKGLKATMDLTNILWLYDEYTDGSG  
AEAVKAAGIVARALREPDYDDGTWVCRMMSFKQNHIDKAGPGVARRFIDNFCNYVEV  
VGREAELEKNEVLDIPNYVTFRRETSAVRTCFDLVEYCLDLDPQYVHDDPVFISGYNA  
GMDLVFWANDLVSYNMEQSKGHSGANVVTVIMKSKGVDLQTAVDFLGGYCEALTAQLL  
EAKRILQARSDAAYS RDVVRLMDAFGDWVRGNVAWSFETERYFGKENKRVKETLLVELK  
EPFVGALALKE

>Agr6

MPGSANWTADRFYIPDTLANWPWPRAINPAYEECKAASAAWCEKYGAFSARAQKAFNL  
CDFNLLASLAYAGLPADVNRVGC DLMNLFVVD EHTDAMDARSVQDWVDIVVDALHHP  
HTPRPAGEPKVGEIARTFWENGICMGPTAQRRFVETFTTYLQSVVTQAQDRDKHLFRDV  
DSYMEVRRDTIGAKPSFALLEHDMELPDDVFYHPLLEKLREWAIDMLILGNDLCSYNVEQ  
SRGDDGHNIIRLAMLQENTNVHGALRFVSKMHDDLAEKFLSNYQGMPSTPQIDAWVTR  
YIDGLGNWVRANDSWSFESWRYFKGDVLRVQAERWVELLPAPKDELTPA

>Agr7

MSFFKSSQPTIYIPDTLRNWPWPREINPHYEECKRESAAWVEKFGAFSAKAQKAFNKCDF  
NLLASLAWSRVNRDGRIGCDLMNLFVVD EWSVSDAEETRRMADIIMDALYDPHKPR  
PTGEWVGGEVTRQYWLNAIRTATPSAQKRFIKAFKLYTDSVVQQSADRDKHLIRDIDSYF  
EVRRTIGAKPSFAINEVHMNLPDYVMEHPVIKNLTAYCIDMLCIGNDLCSYNVEQSRGD  
DGHNLVTIVMHQLNLDVQGAFDWIGKLHDELVDKFLEEKVNVPTFKDKQVTEKEAEYAF  
GLGNWVRGNDQWSFESERYFRKDGMVLTERTVLLPKKREPPPKPLDEDPIYSALPWW  
GWTALFGFLATAFTFSARQLSTRISANLIA

>Agr8

MSEQQYTLPDLLQNWPWNRHLSPIYYEEAKRESSAWVESFKPFDQDQGRAFDAYLLASLT

YSHGSREFVRLGCDLMNFYFVYDEYTDVSDSAVADRLANIVIDAMRNPENSSQSGDHLLG  
KMTKHFWTRALAMAPAGSPCFEHFITTSETYLRAVTQEAEDRANKRVRKVDDYLRLRRD  
TCGARPTLALIEFGLNLPNEVVRRHPSLVALTEAAVDLIILVNDMHSYVRELSCGHENHNLIT  
AIMLEHRLNRQDAFWLGLSHCSRVDQFLSDLDELPSWGEPTDSGVRDYINGLGQWVRG  
NDDWSTESKRYYGEDGETIRQERLVTTTRSGESNYIKFGQVGVQDSVRIQPIEAN

>Agr9

MTAAPLTFTLPDLLANFPWKRNLSYYPECKTESSAWTESFHPFDDEGLKGFNLCDFNLL  
ASLAYSPREREIIRLGCDLMNIFYVFDEYTDIADGDGADKIRDIIMDAFRNPHKPRPEGELL  
VGEMARDFWIRASGYVSPDAHCLTHFLRDFDITYTAAVVREADDRAKRVYRTFEDYLSIRR  
DSSGCLPSFALCEFGDLPEEAYHHPRMAALREQSTDIAIGNDIDSYAMEKARGLELHNS  
VELIINEHGLDVQGAINWLERYAAGVHASFLDNVANMPSWGEDVDRRVKMYIDGLAQW  
VRGNDDWTFESGRYFGDKGLEVQKTRVMSLLPASKVSLRSRPKAVGHVPPKLLRYFRYS  
TMYFFGFHVLAK

>Agr10

MSLNFFLRRYTVFPWSRKLQYYHDAKRESSAWTESFHPFDEDLSKAALTFCITALLASLA  
YFLRQKEIVRLGCDLMNIFYVFDECADIADEKASQIRDVVMDDLHRPEKTCPGGEILPG  
EMVKYVLLLCPPEIPETYYNTKSFGFAPQSSSPQPHIVCATLSRISMPTQQQWFNVKRTIGPN  
VFLARSATVLPYAETHTFYHPRMIALREQAPFLDINSYPMKVRGLVQGSINWLEGYAAGV  
QAAAFLDNIANLPSCAKEVESRVNIYVNELAQWARGNDDWTFESGRYFGDRGPENQSDIP  
TSSNR

>Agr11

MQIILPDILQTWAYARLLNPHYDGAKLESSLWIHPLVAKLFDQKGQKAFQNDYTSLLASL  
MYSHQKGKVPSSRCDMMNLFFVYDEYTDVVSPEIAHRLSKIVVDAMKNSDEMSPCGEHP  
GDKAKEFWRLATLLPATGSNSDVCKSRFINLTEEYLNNAVTVEARDRNEGTHSVKEYLTM  
RRATSGAGLMLALIEFELDLPKAVLEHKFVQALEEIYTRTVSSGQANHNLITVVMHENPGL  
SLQGAFDWLGSYAAGVVECFQTNVRNLPSFCDVEGPACESVDGTLQERVDKYISGLGQA  
VRAEDDWAFETTRYYGEDGPKVRETRVLVIRPVKRITRRHLLQSLEIKYSMVRG

>Copu1

MGLPQATEFVLPDFFAPCPFTLGLTNPHADTVFPEARAWIGKFLPFSGLAWHCDPWAGKE  
GFR TICDFQNLFLMDELTDMSGEDARVVGESFIRVLKDPDVDNESIIAQATREFRTRIAD  
DVATKSVWFGFRFAICKSYADATYIEAEHRENNRVLDDLDFVIARRENSAVRCCFSINEHA  
LGIDLPSVFEDEPEFLRMYFDAVDMIVIVNDVYSYNMEQAKGLAGNNVTVLEQALGVD  
LQAAVNRRGGEMFAQKMEGYVRGRGVPPSWGAKVDADVEHFFDSVDQWIVGNLEWSTE  
TSRYLGPDHEEIMKTGRVVLRKIESKTK

>Copu2

MSTMDPSEFILPDFFATCPFAFGRTNPHADVVIPEAHAWIVKHVPFVDRKRDEFIQDGFQD  
LMPHCYPWAGKETLRTMCYLNLLFLVDDLTDMMNSDEARGFGESFIRVLNDPAVHDSQ  
VMQATREFRSRITGTGVTESRWFGFLAIFKLYINAVCAEAEDRENKRILDLDFTTVARRE  
NSAVMVFFAITEYALGIDLPAVYEDPTFLRVYADSADMVILVNDVFSYNREQAKGLDGN  
NNITVLMQTLDDLQAQAVDHVGEMFSQKMEGCMRGRAMLPSWGVKVDADVERFFDAL  
DQWVVGWVGNLEWSSQSPRYLGPEHEEIMRTRRVLRKVETEIE

>Copu3

MSATPAPTEFILPNLFSVCPLTFGRSNPYDEVIPEARAWIAKYNPFVDSKRAEFVQGCNEL  
LCSRVPYAGREEFRCCDFVNLLFVLDELSDDMGADARSTCDSFIRVLNDPAPDTSLI

AQMTREFRARVAERAKPGCLRRFIALCGTYVEAVCVEAELREQGRVLDLRSFILLRRENSA  
VRCCCLALAEYALGLELPDAVFNDPAFQSVYFCAADMVCWSNDVYSYNMEQAKGHTGNN  
VVTVLMQEHGIDLQAAADRVGEVFGQLMEHYTSGSRSLPTWGGKVDADAARFLEAAGQ  
WVVGNGLEWSFETPRYFGPDHDEVDRDTHRVLK

>Copu5

MHLPEPFHFLLPDFSSHCSYPLRLNKHCVAAAAASEDWLIRLAQLRSPRNGRKLKKFMGL  
KAGYLTALCYPDCPRTELRVVSDYMNFLFTLDDWSDEFAEAGVRGLEQCVMGMLYDPTV  
KTDKAAGRLARSFWLRMIRTAGPRVQHRFIVAFEDFFRAVEQQSRDRAKGVMPLDESIA  
LRRDTSGCRPVFVLAEYAAGIELPDEVFEHPHIIQSMTEATNDLVTWSNDVFSYNKEQALGD  
THNMITLLMAQHGLSLQGAVDFVQGQLCAASITRFESGRITLPSWGPVDCDVQKYVMGL  
QDWIAGSLHWSFETERYFGKRGKEVRQAGVVKLSPMKAPKKV

>Copu9

MSPTATFTTTSSEENAPTKFILPDLVSDCTYPLLLNDNCEPVARASEQWLIAGARLQEPRRT  
KFMGLAGELTACYPHADASHLRVCVDFMNVLFNMDDWLDDFDVDDTWGMRHCCLGA  
FRDPVGFETDKLGGLMSKSFFSRFRQDGGPGCTERFIHTMDLFIABAQQAGDRANGITPDL  
ESYITVRRDTSGCKPCFALIEYAAGIDLPHVYIYHPTLAAMEEATNDLVTWSNDIFSYNKE  
QVTDDTHNMIPVLMRERGLDLQAVDFVGRCLCKGTIERFETERARLPSWGPDLDAQVQT  
YIEGLQNWIVGSLHWSFDSHRYFGKDGHAVKKHRIVKLLPKRVPQQA

>Pilcr\_825684

MPSQSLTIRLPKFEETFSVFPDNGLNPHYANSRAESRAWINQYHHAVCGPNMRTFMDKCN  
FELAGALFYYPYANEAGLRATMDLVNLLWLYDELDTKTETEAVNAAHIVACALREPDFDD  
GTWICSMIKDFNQRHISKAGPNTAYRFIYNFCNYVEAVGTEAGLRAKNEILDITTYISFRRE  
TSALRLTFDLVQYCLGIDLPQYVHDDPVFASGYNAAMDLCWTNDLFSYNREQAKGHAG  
ANVVTVMKSKGVDIQSAVDFVGGYCEALTSQLEARRILLSRSHRVYSKDAVRILEAFGD  
FVRGNDQWSFASERYFGQKNKVVKESRIVEIITPFSDLIAINE

>Galma\_104215

MNTTTRTFYLPRLEDTFVFPDNGLNPHYAECRIQSQAVIDKYYKIVCGPKMRAYMDHCK  
FELITAYTYPYASSDGLRKTMDLANILWLYDEFTDTLSGKDATNAAAIVRTLREDFDDGS  
WICHMMRDFYAAHIEKFGPNVSRRFIDHFCQYVEGTGTEAKHREKDHVLDINAYIIMRRA  
ASAVLTAFDLAHEYCLGIDLPQYVHDDPAFISGYNAGLDLVFLDNDLFSYDMEQAKGHCTT  
NIITVVMKSKRIDLQSAFDFTAGYCESLTQQLIAAQISLASRTDPVFSNNAVKCLEAIANWV  
KGSDGWSFATERYFGKQNVIVKETRAVEMRKSFDIAVLKE

>Sphst\_47084

MPLLSCSQTFRLPPLHETFSVFPDNGLNPNYNACRAQSRAWISKYINVQVCGPKMRAFM  
NCNFELSNAYVYPYAQPAGLRATMDLANILWLYDEYTDMTGEDAATAAVTVSKTLLNP  
EYDDDTWICHMMRDFYVNIHQCRPNVAHRFIENFCRYTEVVGTEAKLREKNEVLDIPG  
YVALRREISAVRTCDFDLVEYCLDLDFPDYVHKDPIFVIGYNAAMDLCVFWANDLFSYNSEQ  
AKGHAAANVVTVMITSKKMNLQSTVDFIAGFCEALTFQLLDAKRALSLEDPTFSRDAVR  
CLEAFGDWVRGNDAWSFATTRYFGPENKIVKETRIVKLKAPVEESVALKE

>Denbi1\_816208

MASKSPSPRTFYLPRLLEDTFVFPDNGLNPNFAAVRPESRAWINQYTKLVCGPKMCAFM  
NCNFELSNAYCYPYAEKPLRASMDLANILWLYDEFTDTESGAEQAQRAAIVHRTLREPDF  
DDGSWICHMMRDFRIHHVNKAGPNVARRFIDNFCSYVEVVGTEAILRERKQVLDIPGYVK  
FRRETSAVRACFDLVEYSLGIDLPQHVVHDDPVFISGYNAAMDLCVFWANDLFSYNMEQAK

GHGGANVVTVIMKSKGMDIQSTVNFLAGYCEALTAQLLESRRILASRPDPVFNKDAVRVI  
DAFGDWVRGNDQWSFATERYFGKDNETIKKTRIVEIKEPFMDSLALNE

>Denbi1\_659367

MTVPIPTSTEQSSAPTRFFIPDTLANWPPRALNPAYEQCKADSAAWCEKYKAFSPKAQK  
AFNLCDNFLLASLAYAHLPEDVNRVGCGLMNLFVDEHSDAMDKNSVHVWVEIIMDAL  
RNPTKPRPDDEPIVGEISRTFWENAIKCLGPTSQKRFIETFETYLYAVIVQADDRDHHVFRD  
VDSYMVVRRDTIGAKPSFALLEHNMDLPDDVFNHPLLEDLRTWCIDMLILGNDLCSYNV  
EQSRGDDGHNVKLVMLQENIDLHGAMQYISDMHDDLADKFLRNYKNMPSWGPIDEW  
VTRYIEGLGNWVRANDAWSFESWRYFKYDGLRIQKERWVELLPANKEDLTSSE

>Hetan2\_454193

MAQKIYIPDTLANWKWPPHLNPHYPEVKRESAAWLASFGAFSPKAQDAFDRCDFNLLAS  
FAYPLAKKEHLRSGCDLMNLFVIDEYSDVAEDEVQRQADIVMDALRNPHKPRPKG  
VGGEVTRQFWELAIKTASPQSQKRFIATFDITYTQSVVQQAADRTHSYIRDIKSYFEVRRNT  
IGAKPSFALLELEMDLPDKVIEHPHQDLILTIDMLHLGNDIASYNLEQARGDDSHNIVTIA  
MNQLKTDVAGAMKWVDNHHKELERKFNESEKLPKWGEPIDSQVARYVDGLGNWVRA  
NDQWSFVSERYFGKKGPEIMKSRWVTLLPKERTEDIGPQVVDSSL

>Hypsu1\_138665

MALSNSNSTTATVTLPTLRFWPWQRHINPHYSACKKASSEWCESFKAFSPQAQRAFNNK  
DFNGCRIGCDLMNLFIIIDEHTDIASAETARTQANIIMEAIRDPEMPRSENEWVGKAAQ  
FWLNATKSATPSAHRFIDAFQMYMDAVVQQAADRSKNYVRDIDDYFVVRRTIGAKPS  
FAICELYLNLPDSVMEHPVIMKLTCLCIDVIIIIGNDLCSYKVEHEHGDDGHNLITVVMNQF  
KITPQEAMNYISDLHDKLAVQFLDEWKNIPTFGGPLDLEVRTYCHGLGNWVRANDSWSF  
ESERYFGKRGIEIQTRQIEMNIQSHL

>Pro1

MSQRIFLPDTLANWQWPRHLNPHYAEVKKASAAWAKSFRAFQTKAQEAFFDRCDFNLLAS  
FAYPLADEARLRSGCDLMNLFVIDEYSDVSTEEVRAQKDIVMDAIRNTEKPRPAGEWIG  
GEVSRQFWDLAKKTASTQAQKRFDITFDEYLESVVQQAADRNNSHVRGIESYLEVRRNTI  
GAKPSFALLEFDMQLPDEVINHPVIKELEKSCIDMLCLGNDVVSYNLEQARDDGHNVITI  
AMNELRTDVAGAMIWVDEYHKQLESRFMENFKKVPRWGGPIDLQVARYCDGLGNWVR  
ANDQWSFESERYFGKKGPEIIQRRWITLMPKMVSEELGPQIVDGFHL

>Hfas94a

MSAQQYIIPDLLANWPPWQVRVNSMLDEVREANEWVMSLGLFEPAQFKKFRACDFNLLA  
SFIGPLESKEHLRVACDLMNIFYFAFDEYTDVASREEAMKIAQGVMDAFKTRSAEPSSKIT  
EMARQFFRRTVDVVGEDSPAINQFITDFDITYTTAVIQEADDRAEGTIRNVADYFTLRRET  
GAKPSFSFFALGLNMPTEVFEHPLIMSTVECATDLIAIVNDMHSYGLERARGLDGHNVVTS  
IMYEHQLDLQGALYWLAGYAEDTIAKFFSEKERLPSWGRAVDLSVQEFVDRLGRCVRGY  
DAWSYETNRYYGNCGVQIRQTRRITLPGNDSGYITKKEMGVSA

>Hfas94b

MSYAPTVEELKQWEKGPNPELLFGNSFPLARDHPDWQKLEQENDQWVEENWQFDDKEL  
REYLMSSKLGPFSMCFPGEREKLLWICRLVTLLFCLDEDLDRHVNHLHLLPILKALTAGS  
RKPENNYAELAIKDCWRAIERTSTPSTFRQFVQITHEYFDSHGQIPYENFDQYVGARRTNV  
GAYFMWACLRYAAGIDLTDEELAHPLIKRLEDIAGFHIAFTNDLISYTKFLTDTATNNILTL  
LQRNDGLTPAEAEAKIRRELKKSSEDYQVAAKEVLNHPVLGKNKAIRKLVLNIPYGMGG  
NAWWSLITKRYNVDPVNHPLPQVKIHIDPSPMPYHPDAVAFLDNGSKKALTTKGAKSFLSS



WTVWFGALL

>Hfas255

This sequence is not available.

>Hfas344

MSQSQFTIPDLLASWPWPRAKNPALDQNLDEANAWVASLELFEPRQLDKFKACQFNLL  
ASLVGPIEGRDSLRLSCDLMNFYFAFDEYTDVVSGDEVMMIVADVIQAFRDRESPEGSSKI  
KEMARQFFQRTIALVGEDTQGIDHFIADFEAYAKSVVQEADDRVQGIVRNVEEYFILRRDT  
CGGKPSFSFFGLGLCIPKEVFDHPVMQSLTESATDLIAMINDMHSYALEHARGLDGHNVT  
AIMHEHSVDLQGAFYWLSGHASKTVSKFLNDRKNLPSWGSIDKAVNEYIDRMARCVRG  
YDAWSYETNRYYGKNGLEVQKSRKIMLQHRELEMGYITRDQLLIGAA

>Cun3817

MVMYKRNATFNDGPVTQIQDIPSISSLFFTMVNQLRPFPSRFVLRDLTAVTEPVFKLRNPH  
QEEAYRNIERWFKDLKVYPEPKQRKELSHAEDLYAGLSFPDADVEHLETICIAFFLWAFSFD  
DLSDEGEFQSKPDRVQVGVDISMEVLNHPPEPPKFKYAAMLHDVWRRFRSTASPGACD  
RFKAVESWMKSQVEQAANRSWNTVPSVDEFILLRRRTIGGEIVEAMVEYSLDIKPEYVW  
DHPVLVGLSRAAIDIMIWNDLCSFNKEQADNDFQNLVFCVMLERNVDLQSALDIVTKML  
ATRVDYAKFKAQLPSEGAEVDQELAAYEKALEHYVQGTWVYYESPRYFRGMDVTDKT  
DMVIPVYSRSADAPTSPSVSTRVSYLSNRSMPPRSSKASV

>Cun5155

MANESLTTTQLFIPDVLRSWPWPQRINPHYAICKAESDTWAQSFNAFSMKAQQAFLRCDF  
DLLASLGCPRLDKEGCRICCDLMQLFFIFDEHSDIVDTTVVRRQADSIMAAIRDPTRPREG  
EWIGGEISRQETANAMRVSTPTFQERFIVAFQEYTDSSVVQQALDRDRHNIPNIEQYFNRR  
DTIGVKPSVAMLEIQFDIPNEVSNHPAISTLRSTCVDMIANDLFSYNVEQALGDDEHNLT  
VVMHEHECSLTDALWISDLHDSIANTFLSVMKTVPSFGDLVIDEQVAIYVDGLGNNVRA  
NEANSFESERYFGKNGLEIQESRVVDLLPKQEN

>Cun3157

MSSNAVSFTLPDLLAICPLQGRTNPHYEAAAAESSANVLSENVFSNRKQDFFVSGGSELLC  
SHAYPYAGHEELRICCDEVNLLFTYDEISDEQNGQDAYKIGLVLLKSLRDPEYNDGSVLCT  
MTKQFQERLFPRMGPCYERFVDHVENYINAFVKHAEYREKNVVLDMASYEILRRLNSA  
VRCCFGLFGYVLGLDLPDEIFEHPDMMAMHLAAMDVMVCWNDIYSYNMEQAMGHTTNNI  
MTVLMKAKNVDLQGAADYVGEYFKVLMDRFFDHKSKLPFFGPDMDPTAEQFVMAMES  
WIVGNLANSFETLRYFGKREQVKVTLVVELASKKV

>Cun3158

MPALTRTFKLPDLLSMCPVKGSTNPHYEAAAESSANINSYNLETDQKRAFFIQGSNELLV  
SHTYPYADYEQERICCDEVNLLFVYDEVSDDQSGRDARATGNVFLQVMRHDDWDNGSP  
LAQMTKEFKARFRKFAGPGCYARFLVHCENYINAVGHEAEYRERGYVLDMESYETLRL  
NSAIRLCFGLFEFVLGVDLPDEVFDDPAFLNLYNAAADMVCWNDVYSYNMEQAKGHSG  
NNILTVLMQAKNIDLQTASDLVGDHFAELMRRFLEGKRALPSNGLATDTAVAAYVKALEH  
NVKGNLVNSFETQRYFGPKHEEIKKTLLVVLRAPSFD

>Cun0773

MVAHTFSLPDDFAKTPYQSRLHPLTGIVVQKSQEWVLRKVNYDEKERTAFLKTSGGLLCG  
YCYPNADAFHIQVCADRMDWVFCLDDWSDECSVAEAQSVINSIKEYPRYPHEHSGSTPIIE  
LAKNLYDRFFQTAAPGCAERFVRSMDIYLDGVVEQADCREKGSILDTESYTILRRKTSKV  
WPCFALIEFAARIDLPAVVEHPLIRSMEEATNDWISWINDILSYSKEQADKDAHNLIIVIM

NQYTLDLQSAVDLAGSHCFDCITKFEDNRKALPSWGEEIDREVDLYVQGLQDWIIGSLHW  
SFACRRYFGAEGKEIKEHRTVFLSEKHQS

>Cun7050

MQSATAPVLSSQPSKVVIPDLVSHCDFTLRCNSNQERASAECKEWLFQGSNLSEKQNAE  
HGLKAGLLTSWCYPDAEYHHLRVCCDEVNWLFLDNISDDMNTENGTSRTAVDIMNTLY  
HPYSYSPVSPEGKLIQDFWRRLIPTASPGSQQRFNRTMDFFFQAVTQQALDRANGVVPDL  
DSYIALRRDTSGCKPCWALIEFAYNLDLPNEVMEHPTIVALGEATNDLVTWNDIFSYNVEQ  
SKGDTHNMIVVMRQEGLDLQSAVDVFGDLCKQSIDRFIEQRAHLPSWGPIDQQVEKY  
VGGLADWIVGSLHWSFESERYFGKSGLDVKKTRVVLLPRRA

>Cun0716

MSRFNADSFVLPDLVSHCTYPLNLNTNWHSVSRASEQEVLEEANFSEMKRGVFMGLKAG  
ELTSACYPYCDAFHLQVAADFLGYLFTLDDWSDDFDELGTKGLAVCVMNALRDPHGFQT  
DKPAGILAKDFFSRYISKGGPGCIERFIDTMDLFFIAVERQAIDRENGVVPELEAYIPTRRDT  
SGCKPCFALIEFAADIDLPEVVEHPTIAALEEATNDLITWNDIFSFNVEQSRGDTHNMIIVA  
MRERGLDLQDAVDVFGELCKQSIDRFEHDLTPVPSWGPEIDRDVRTYIQLQDWIVGSLH  
NWSFDTTRYFGQDGTVEVKLHRQIKLLPRKGPCSD

>Cun0759

MARSTEALPDLVSHCPYPLRINPLCDIVTQKSEEWILNEAKYTPEKRIRFLNTKAGILTAYC  
YPDADDFHLQVSSDYLTWLFCDWSDFEDETACSFADCIMGCLRDPYGFKTDKAAGR  
LTKSYFGRYLQTSGPCAERFIDTMDLYLKSVAQQAADRDGRTPDLETYIGLRRDTSAC  
RPCFALMEFVAGIDLPEVAEHPLIRSMEDATNDLVSWNDIFSYNKEQSRGDTHNLVAVIM  
EERKLDLQSAMDFAGELCHQSISKFEADRRSLPSNGKEIDRDVQLYVQGLQDWIVGSLHW  
SFATKRYFGTEGEAVKHHRTIQLLPRKDGVEPKDTPVRQNVIVYLFNMFFTIVLGSFLGN  
MKEGLSSPLRVPRP

>Cun3574

MSPKRFPVFPDLVSHCPYQLRIHPDCDTVNKTSEEWIMKDITFTPDRLKRFLDIKAGVLTAY  
CYCDADLFRQLQASSDYLTWLFCDWSDFEDEDESCSFKDCILGCLRDPYGYKTDKIAG  
RLIADFFRRELQTSGLPHCAQRFIDTMDLYLDSVGRQAADRIERTPDLESYIALRRDTSAC  
KTCFALMEFANGDLPEVSEHPLIREMEDATNDLVSWNDIFSVDKEILIEDTHNIVAVIME  
DKKLNQLQSAVDYAGDLNNCIARFDEARKQLPSWGPEIDREVQLYGQGLQDWIVGSLHW  
SFVSKRYFGLEGEAIKKHRTIELTPAMKSDVEA

>Cun9106

MTSMPQASSSRDPLELERLADELAERELRSPNAQSFQDHTLPAWAPLAHNNPYLSAETFN  
VEEFLLSRYSYTSPLDMRAELRDYLAILKEELVRLINDDYEAFLSLSTDRLRGEGTRLEKLKFP  
LEELRSEVITSRTELQQIQDAVQLKLQRRSSLREEKAFLHLLKISESVTRLESLLIAAPSEE  
EQHSTDFSVTGLQASRRGGQHEDEDRTNRNRAKHLRVAAEYTTQLLYHVNKAKIDQCAF  
VDECQWRIDRIRSTLSSDLHLFSTTLKALTRGKDHKPSSEKAKLMADVSECLRTYDSL  
GLWRDAEEVLRDVRVHDFVKKVYIMLTCKIIMSLTVLIPDNSCQFANSSPQSNNAAAYTLPS  
YSPTQPQYYT

>PpSTS01

MSSAPSTSAPTIVIPDLVSHCTIPVRCNRHWKQASVESKRWLFRGGNLSDRKRDAFHGL  
KAGYLTSMCYPLAGYPQLRVSCDFMNYLFLDNISDEMNDRGTHGTAVSVLDALYQPHM  
HPTSRVGMKTKDYWVRLIQTASPGAQQRFIETFDMMFFQAVTQQAMDRANGVIPDLESYIA  
IRRDTSAGCKPCWALIEYANNLDLPWEIMDHPHRLGLGEAANDLVTWSNDIFSYNVEQSKGD

THNMIVVVQNQQGLDLQSAVNFVGDLCQSIDRFHYLRENLP SWGPELDREVEIYVDGL  
ADWITGSLKWSFESERYFGKAGLEVKKTRVVALLPRRA

>PpSTS03

MGSISSTPSQKSPVFPARSLLP SDIVAVRPEGDEAKVLKFPDLVKSIPFPLRLNPNYIRFVSAES  
DAFIIEYANFSEKQRNRFIGL NAGLLCGMCYAECGPEQLRVCCDFMSFLFNLDDWSDEFDT  
AGTKGLEEAVMNTLYHPDTYVSDTVAARTARSWWTRMLKTVGPRCQRQFVETLGFYFK  
AILQQAADRSSKTIPDLETYISLRDTS GCKTG FALIEYAAGIDL PNEVVDHPHIIQSLLDATN  
DCVSWANDILSYNREQSRGDTHNLVPVIMQTVGIDRQAAIDYAGDL CNKSVAHFLEGKA  
ALPSWGKEVDVQVEQYVQGLEDWIIANA EWSFMTERYFGKDGP KIRKGLQVSLLPVVGFD

>PpSTS06

MTVIADTSRCFILPDLISYCQFPLRCNPHRDAAQSSTSWLINNYPGMSPEQLVEVRRLDAD  
TLASYCYPDCDVERLRVASDFLAILFHLDDITDTMEEGGTEQLEGTIMDAFRSEGKLDQRE  
DEPRVRVPAKDLWTRFIRNAKPCVQTRLRDNIALFFKTAREEARDRE RGVLLDLESYINMR  
RGTSACLSCFALTEYSIGIELPQYVVD DPIVQALNQSANDLVSWSNDIYSFNNEQA HGIHN  
MIVILMKSQGLGMQDAIDYVSDLFKQTIDGFMENTQLLPSWGAAVDADVR L YVQGLQD  
WVVGNLHWSFATERYFGKRGAEIKATRVVELLPKKPVS

>PpSTS08

MLYLPDTMSAWPWQRAINPYFNEVKAASNSWFKSFRAFSPASQKAFDKCDFCLLAALAY  
PRARKEHLRTGCDLMNLFFVIDEYTDVEDANVCRDMVDIVIDALRRPHDPRPEGEVVLGE  
IARQFWARAIETASPTSQRRFLETFIAYLESVVLQAADRDCDAEHTVQTYLAQRRDNIGSY  
PSYAVLELALDIPDDIFYHPAMNELSLYATEMLIIDNDLVSYNREQASGDTNNILFVIMRQF  
NCSLDHAMAWAAAYHSQLEARFMDAFKRMP SWGLEIDSQVEEYCQ GIANWPRGNDCW  
SFESGRYFGDKGREVQKTRCVPLLPKKERDTS LRQQDVVITSL

>PpSTS09

MVRTRPTYIYLPDTAAGWPFPRTVNPYYEETKA ESEAWISSLYPFDAYVQKKFNACDFTLL  
ASMAYPWLSKDHIRTGADLMMLFFVFDEYSDVASVKDAQEMVDIVMDALRNPHKPRPK  
DENILGEIAKQFWERGVKTASAPSARRFVDYFEGY LKSVVEQAQDREHN RIRSIAEYFDV  
RRLTVGARPSYALMELGMNIPDEVWEDPAMEIMAVCVTDMIILDNDMLS WNVEQSRGDD  
AHNIVRIVMEANKTDVASAMKWVEDYHNL LKKTFLDVYNSVPSWGP EVDAQVQEYARG  
LGNWVICNISWSFESARYFGKEGRRIREERVVAILDKPVLVGVLESDA

>PpSTS10

MPSTPRQFVLPDLFPLVPFKGSTNPHYVKA AEAESSAWINSYNVFTDRKRAFFIQGSNELLV  
SHTYPYAGYEQFRTCCDFVNLLFVVDEVSDEQNGKDARHTGNVYLKAMRDPEWNDGSV  
LAKMTKEFRARLLQYAGPGCYARFLKH CEDYVEAVAKEAEYRECGVVLDMASFETLRRE  
NSAIRLCFGLFEYCLGVDLPEYVFEDPTFMTLYWAAADMVCWSNDVYSYNMEQAKGIG  
GNNIVTVLMQAKGIDVQAACDAVGEHCKLLMERYLDAKEKLPSWGPSVDDAVAGYVQA  
MEHWIIGNLEWSFETQRYFGAVHAEVKATRVVMLRPREIDED

>PpSTS14

MSDQPKMIYLPETMANWPWPRIYNPHYEEVKAESDAWFKGFKPFTKQSQVAFDKCDFGR  
LASLAYPWASKEHLRTGCDLMNVFFMIDEYTDVECASVVRGMVDIVIDVINNPHKPRPEG  
ESLLGEITRQFWERA IKAATPSSQKH FIEAFTDY LNSVVEQAADRDN NHIRTVD SYLKTRR  
ENIGARPSYFPAELGLNLPDEAFYHPVVT ELSYNIAELIILDNDIASYNKEQATGDDRHNILT  
IVMLQFNIDLEAAMTWVASYHKDVENKFLDGMKKLPSFGPVVDKELEYILALAIWPRT

NDCWNFESGRYFGSKGLQVQKTRYVPLLPKVKTDPTLKQKQVVVSLVDL

>PpSTS29

MSAVTQVVETAIGCVIPSCIEFGSSMRIATSLGSPSVTQSPCVNRDVEDIARTARESIRFFLAE  
LSIECVPYTQDPALEAQVASATRCWPDRERLAPHIRTGIVIAATAYAHNSLATRTLIALYTAI  
GVALDEPDILESANAIGFHHS�CTETSERPSAILDEWRRILARMWDHFPRFGASCILTSTLQ  
FLNMTMLENETKGKVLNRTAMPFVEYRRMTDGFPEVYTAFIWEKGRFPDVQVYMQAIPN  
AMRFINFGNDILSFYKEEAAGETGTYIHDRARLTGLSSVETLREVVEETVSAWRQVCEILG  
EGIARDAWNSFVRGYVTFHVHNPRYRLSELL

>Fompi1

MSRRYQTSRFSPSAKGKKTSLYTSPGDLRALFHRFSLYAGVQLESFTSPKMMQIEVPVMLN  
LKESMPMNSTVLEDCTAAVAKDAIVQFLRRLGAVLRPSFGNNRDLEERVKEITKTWPFEH  
RIHPHITTGVVMANTTIAYLSDL DARA AYAAYTALITALDDPDIFHASGAQNFAQMLCDGS  
ALRDDGVLGQMARVLADMGNHFPFGTSAIIAATLRWCNGELISNPANPFCLRPLSKAFA  
DYQRGLTGVPEAYAAFGWCKADFPVETDYIHVPDICFFLNHTNDILSFYKETLDGESDSY  
IHARARLTGKSVTDTLYEVMDEVITTTERRIRKHFGEGRMRNAWDRIYEAGYVWFHTGNPR  
YRLHELVDTEYMPMY

>PcSTS01

MQTQQTSSVSSSPRKIIIPDLVSHCTFPLRNNRHRKQATVECKRWLFKGGNLSQKKRDAF  
HGLKAGLLTSMCYPNAAFPQLRVCCDFMNWLFHMDNISDDMTDRGTANTGVDVMNAL  
WLLDDYTPTTTRVGKMARDFWRRAAVTAAPGAQQRFRETMDFFFQSVTQQALDREAGVV  
PDLESYIALRRDTS GCKPCWALIEYAYNLHLPDEVMEHPTILALGEAANDLVTWSNDIFSY  
NVEQSKGDTHNMIVVVMQQDGLDLQSAVDFVGDLCQQSIDRFVYERDNLPSWGPEIDRQ  
VDIYVDGLRDWIVGSLHWSFESERYFAKSGLEVKKTRTVNLLPLRTAVAEPTQI

>PcSTS02

MQSFVLPDLFAVCPLVGSTNPHYAKAARESSAWIDGYRLFTDRKRAFFIQGSNELLVSHTY  
PYADYEQFRTCDFVNLLFVVDEVSDDQDGKGARSTGEVFLNVMCDPAWDDGSSALAQM  
TREFRARFMQYAGPNCARRFLVHCKDYVEAVAREAEELRETGEILDVEAFKHLRRENSAIR  
LCFGLFEFALGVLDLPDAVFEDETFTKLYWAAADMVCWANDVYSYKMEQARGIDGNNIVT  
VLMHERGVLDLQTAADLVGEHFARLMDTFLQTKRALPSWGLTLDTAVAAAYVAAMEHWVI  
GNLEWSFETQRYFGPTHAEIKRTRVVELRPTEDAFDGDD

>PcSTS03

MSTYPALRSYRLPDLHPLCPFKARFNPHHEEAAAASKAWVLSFNALKGKKLEFFKEGGSE  
LLCAWAYPYASLEGLRTACDFVNLLFTIDEISDEQNGNDALATGMSVWNTMKDDNYDDG  
TVLCRMTKDFKKRFFPYAGPATRRFLKHTEDYVLGFAREAEELREKNVLSLAAYDPLRR  
ENSAVRYCFGLFGYLLGMDLPDEIFEHPLYMEMHLAAVDMVCWANDVYSYDMEQSMGH  
LTNNILTVLQREKNIDLQAASDYVGVHFKELADKFEANKALLPSFGKELDDVVAHHIMA  
MEAWVAGNLEWSFGTRRYFGKNHMKVRETLVVELSPPRVLDD

>PcSTS04

MPAIAPPSAPATYRLPDLHAVCGFKARFNVHYEEATAGSKAWYFSYKTLTGKRLEFFKEGG  
SELLCAWAYPYAGLGQLRAACDFVNLLFTVDEISDAQNGVDALATGMSFYNTLKDDNYD  
DGTVLCRMTKDFKKRFFPYAGAATARRFLEHTKNYVLGFAREAEELREKNVLDLASYEP  
ARRENSAVRYAFGLFGYILGMDLPDEIFEHPIYMEMHLAAVDMVCWSNDVYSYDMEQSL  
GLAANNILTVLQREKNVDLQTAADLVGSHFKVLVDKFEAAKARLPSFGKELDEIVAHHIL  
AMESWVAGNLEWSFGTRRYFGKSHLKVRETLVVELSPPKYLGD

>PcSTS06

MAPVIGTIEMPPASDGFGNPAKISPHERSEEEESLPYLCRYVITEFLRRAGIQMPTFNAASFG  
DEVDRLTFAEVAKWDIGNANPRRLHHHVVSAINIAKTAYAHTPVPTQVHIAMWTALCIFV  
DDFEIETAAVEQFAERFHAGGPQLHPLLDVFAGTLRAMPRFFHAHGAAGIVANTVQYVTS  
TLFDKVTEEKGLEVHASARDYPLYKRARNIGEGYGFCIFDKENFPDVSTHIQVIPEAITYL  
IYVNDLLSFYKEELDGETKNFIHDRARVTGKDIEAALMDSMEDVIDAVNRGRQILQGEKE  
RKAWDSFLVGYVAFHFISPRYKLERLLSGMN

>PcSTS08

MLVDLAGQLQARLRALVGVEYFKDFVAVNDERAGTEETCRNALRCFVGRVKIPARVMQP  
DPTGSVTQSLRATVKAWGCIDTTS AACQKRVA AAVAITTLVFRHTRLDTQAYIAGYAFLAIS  
LDDEAIGADALAAAFAPRMLSGEPQGHVVLDRFIEHVQSAPTFFGAFSVA AIAACTVQFVN  
STLLDRTTSNRVCLTAGSLPYVLYKRAINGVGDSFALFAWEKDRFPDDSLFLQVLPDLCRF  
MEYTN DILSFYKEELAGEKDNFVHDIMTVSELPA PGVLEGLVDAAAETVQRARLVLQDSE  
ERKVFESMLEGYVAFHYTSPRYRLGDL SGASPADSD

>PcSTS11

MCATLTDFLWQAEAAKHAVDSL LLSRAPLPEWKTMTFDADGTLERRIREVVADWEP AVT  
SLQGFERSILISAALGMSFN SHSPMEVRLQVALYSLVIFLTDDCEIPAAALDEFMHRFYSGR  
PQLHPVLDHMVEILHGMDEFFPPLAVKGIVQGTVDYMNVN AFEPHA EKLPLHPAALS YV  
TARRMKHGLAEPFLMFLFDKFNYPDVSTWVQAVPDMMIYTNWANDIYSFHKEILADDVH  
TYILERA EVTGKDLTETLSEIVDEAVVACDNVRKILKGTKALEAWESFVAGYAAFHRYTPR  
YRLKELYGDEERDRM

>A8411

MSSTKIGKVAPFPPLPGQPWPPARNHPRWKELYRLHDEWLMKHWPFSSEKKRARIPFMNL  
AGFSTWCAPASDFDRMVWGGRIAGIFFLADDYIDSGKMLDRIPGFKKAATGEGPLHPEDR  
AEICHDIVFRAIKETSHPRTRQLTQCTHEWWDSNIHEPFRNLDQYLATTRVNIAMYFANA  
YFRYCLDINLTDEQVNHPLMREAEGIVSDHVGLTNDLFSYAKEYLTQSDDTNVLRMLQDF  
EGLTYEQAKDVTVKIRQKEQDFIPAGLAVLNDPELGKDPEVHRWIANLPYCMGGNNAW  
SQESGRYNIGDVP GAPPFSLSF EAEATPEDEVDDTEESALRDAVFNVEVIPEPDTLDID  
AIESKGVRTKTQASIPPSLQLMNIPQSRVQHVGVR AIASSQRTGSDDNSLILKAVASLVR SY  
EIDVQTVGKVM IYLQNSNIPVHAADLVHLLSQSEIEVNISNGDSSALLLDAITHVESNTWD  
ARNVITVAVTKQSVVTMLVGPNAPIVMEPVRGVFTDNHTQKLPSSYFTALQKSYESYLK  
RLRVSLSKEIDLNEATGAASVFDYMLTDHPEKLAELFRVSPCLSKDDNALPMHPRDFQKK  
VVFN GPDNGSIYDGLVCLVDAVPSYEFFEKRIAIFSESNNGTSTFFCLRAVSDTKYMRDTLK  
AVGGVPRRT

>GsSTS43

MSVEQLRPFPTHFRLKDLAAISGRVFEFKLNPHEREA AEATHAWFDSRNVYHGLKKKRFL  
SHRFD SYAGMSFPDADVSHLET CIAFFLWAFSFD DLSDEGALQSKPEAHQVGVDISMEVL  
RNPDA PPPNFPYAAMLHDIWRRFRATASPGACNRFFH AVESWMNSQVEQARNRATDEIPS  
VEEFIILRRRTIGGPIVEAMVEYSLDLHIPEQVWDHPVLQEMSKAVIDIMTWPNDLCSFNKE  
QADGDFQNLVFCIMIERDCDLQTAVDVLTEMLSQRVIDYERHRAQLPSFGPEVDAELARY  
NKAIEQYTQGTVVWYYHSPRYFRGQEVGTGPIEVVPVYERTTPAPEEPTPSASKSARSAPA  
NVSPSLSKQAGLFVNTPVQHNARLSLLLVSLVACLLCASFVSFPSFPLNPRLVLS

>GsSTS45a

MSIEQLHPLPSHFRLKDLAAITGRVFELRLNPQEREAATAAHAWFDSHHVYQDLNKH RFIS

HAFDSYAGMAFPDADVSHLETCITFFLWAFSFDLLSDEGTFQSNPQAHQAAVDISMKVLR  
NPAAPPPDFPFAAMLHDIWSRFRATASSGACNRPFVHFYRLFLLILNHISRFFRAVEGWMR  
SQVEQIRNRAIDEIPSVNDFIILRRQTIGGPIVESMIEYSLDLRIPEDVWDHPILQDMSNALID  
LMTWPNDLCSFNKEQADGDFQNLVFCIMIEQDCPLQTAVDILTDMLSQRLVDYEELKAQL  
PSFGPEVDAELTRYIKAIEHYTQGTVVWYYSSPRYFRGQAVSGIPEIVVPVYEKSASMQDT  
TLTPTAKASKPAPVVKHSPWVKADSSFVHTHVVLQCMYLLLVLVAFVVVVLVSVNKITFMI  
>GsSTS45b

MSIEQLHPLPSHFRLKDLAAITGRVFELRLNPQEREAATAAHAWFDSHHVYQDLNKHFRFIS  
HAFDSYAGMAFPDADVSHLETCITFFLWAFSFDLLSDEGTFQSNPQAHQAAVDISMKVLR  
NPAAPPPDFPFAAMLHDIWSRFRATASSGACNRFFRAVEGWMRSQVEQIRNRAIDEIPSVN  
DFIILRRQTIGGPIVESMIEYSLDLRIPEDVWDHPILQDMSNALIDLMTWPNDLCSFNKEQA  
DGDFQNLVFCIMIEQDCPLQTAVDILTDMLSQRLVDYEELKAQLPSFGPEVDAELTRYIKAI  
EHYTQGTVVWYYSSPRYFRGQAVSGIPEIVVPVYEKSASMQDTTLTPTAKASKPAPVVKH  
SPWVKADSSFVHTHVVLQCMYLLLVLVAFVVVVLVSVNKITFMI

>GsSTS26

MSDNSENILYIPDTMSAWPWPRKLNPLYEVVEAESIAWMESFKPYTPESQTAHNKGDVGR  
LAALVLGDAPRESLRIAADLMHLLYIADEYTDMEASAGVQEISSTILDALHNPDKPRPEGE  
SVIGEMTKEWWTRVRVATPQAIKHFLGAMEDYLDVGEQADDREKLAIIRDVDSYLEAR  
RYDSAVVACFMPGELYLSIPDEAFYHPVVKQLQDASTELVVLNDNDVASYNREQATGHGK  
WNILSVVMHQFGLDLHGATEWVAQHHKEVEARFFDALARLPSFGPMVDAELQEYVACV  
AAWPRGNDCWRFESEYFGKKGAEVQKTRRVPLLAKRSMNPEMRRERVEVQLIEELEQV

>GsSTS27

MSDNSENILYIPDTMSAWPWPRKLNPLYEEVEAESIAWMESFKPYTPESQTAHNKGDVGR  
LAALVLGDAPREPLRIAADLMHLLYIADEYTDAESAGVQEISSIILDALHNPDPTRPEGES  
VIGEMTKEWWARVRVATPQAIKHFLTAMEDYLGAVGEQAEDRDKLAIIRDVDSYLAARR  
YDSAVVACFMPGELYLSIPDEAFYHPAVKQLQDASTELVVLNDNDVASYNREQATGHGKW  
NILSVAMHQFGLDLHGATEWVAQHHKEVEARFFDALARLPSFGPAVGAELEQYVACVAA  
WPRGNDCWRFESEYFGKKGGEVQKTRRVPLLAKRPMNPEMRRERVEVQLIEELEQV

>GS02363

MAVTPASANTQDSTKEIILNFPDFISPIPYPLRCHPQEREVSRESEEWLLSMANFSEQQRAK  
FLTNLAGLLSGWCYIDCTFDELRVCTDFMNFLLTDDWTDEFDTTGTRGLAECVMNTLYF  
PETYSSDTAAYRLTKSFWERM RATAGPGCQQRLMSTLDTYFQAIMQQASDRGSRNIPDLE  
EYILLRRDTSGCKTGFAFIEYAANIDL PDEVIEHPPIKAMSDSTNDLVSWANDVLSYNAEQS  
RGDTHNLVLCVLMNQNGVDRQEAIEQAGALWEKTLNWYFECRKAVPSWGAEVDRAVALY  
IQGLDDWIIANA EWSFETERYFGKEGHTVKKTRQVALLPQRRA

>GS14272

MAIAASKPKTPDHFVLPDLVSHCNFPLAYHPHGDDIAAESVRWLDEGCPESPRGRKAL  
YGLQAGELTAYCYPYCSTERLRVVSDFMNYLFHLDNISDGMMMRKGTEELADSVMNALWF  
PDRYMPTACDGKEQPADEV SAGKLARDYWTRCTDAKPGPQARFKENLELFFEAVYQQA  
RDRDTKLIPDLDSYISVRRDTSGCKPVFDLIEYAMDIDLPEHVVRHPVIQALNQGANLVT  
WSNDFSYNVEQARGDTHNMIVILMELRGFDLQTSVDFVGELCRQTIDTFMENQQNVPSF  
GPRLDRDVALYIQGLQDWIVGSLHWSFMTERYFGKSGAEVKKHRIVRLLPRRPKRIPVSA

>GS11330

MLSTLPPASGVHHPLITTTKETEDPLSEVKVLISDFLDRSNYKSPQSPCDLELRKKITEELS

TWPSDINPTAISKIIDGCCVFVETAYGHTTHEHRCFIAFYIAFCIYIDDLGERDLDAIKLFTSR  
LVKGETQPDPIRLRLAEHLGCVYDLWTPFGADAIAGTLDAITATYLEFTTQEMVVKPAST  
RFPYYLRTRAGLGPPAIHFLFMKDWRATPESYLQIIPDMEHWTLGTNDILSFYKEELAGER  
NNYVHLRASAEQSSAANVLRQLVEEVLESAAKIDALTSEDPELAALWKRYQQGYIEESLK  
AQRYLAEELGYQA

>GL26009

MAVTPASANASDSTKEILKFPDFITPIPYPLRCHVQERQVSRESEEWLLSMANFSEQQRAK  
FLTNLAGLLSGWCYIDCTFDELRVCTDFMNFLLTDDWTDEFDTTGTRGLAECVMNTLYF  
PDTYQSDTAAYRLTKSFWDRMRATAGPGCQQRLMSTLDITYFQAIMQQASDRGSRNIPDLE  
EYILLRRDTSGCKTGFTFIEYAANIDLPEVVEHPHIIKAMSDSTNDLVSWANDVLSYNAEQS  
RGDTHNLVCVLMHQNNVDRQEAIEQAGALWEKTLNWFECRKAVPSWGPEVDRAVAM  
YIQGLDDWIIANAIEWSFETERYFGKEGHTVKKTRQIALLPQRAHA

>GLSTS6

MSVEQLRPFPTHFRLKDLAAISGRVFEFKLNPHEKEAAKATYAWFDGRNVYHGLKKKRFL  
SHRFDSYAGMSFPDADVSHLETCIAFFLWAFSFDLSDGALQSKPEAHQVGVDISMEVL  
RNPTAPPNFPYAAMLHDIWRRFRETASPGACNRFFRAVESWMNSQVEQARNRATDEIPS  
VEEFIILRRRTIGGPIVEAMVEYSLDLQIPEHVWDHPILQEMSKAVIDIMTWPNDLCSFNKE  
QADGDFQNLVFCIMIERDCDLQTAVDVLTEMLSQRVVDYERYRAQLPSFGPEVDAELARY  
NKAMEQYTQGTVVWYYHSPRYFRGQEVGTIPEIVVPVYERTTPAPEEPTAPASKSARSAPA  
NLAPSSSKEVGLLVNAPTQHNRRLSLLISLVACLLCASFISFPSFPLNPRVLISI

>STC4

MVQFRIPDLLSCLPACIKATNADNDILQAGLVVIDQCHLTDHYKKDLKRAQIPHLAIRAFP  
GSDLKYLRICVEYLIAAFLLDRLTDKPATAAQAQEWADIYKQYFRKTLQGTKGPARINQYL  
TKKCDIYPQAFSKTFEKTGPAEIKYLTSHMSNTIKDPYWSCLVENNILLADGMAKEAVDR  
ENPGTEMDLETYIKVRRDTIGARQLFDLGRWIELNITPETLTHPDIVRMEEQFIDLISLAN  
DLYSYKKEYLAKDAKHNYLTIALRDPTADLHENDLQGAINYTYDKFCQVLTDLHQKKV  
LPRFGKSEEAKVDKYFWLMMNVVIGTIQWSLECERYGHFVDVDGPNQGDVVFNL

>STC9

MFRFDHPSSFILQNICDITGAVFELKENPLREQANTAVLKWFKGFNVYDKAQGEKFINAGR  
FDIFAALSFPEADIEHLTTCLAFFLWAFSTDDLSDGEYQSKPEKVRRGHEISCSILHDDSAP  
QPSYPYAGMLWDLRLRLRANGKSGMYKRFKQAFLDWSSSQVQQSLNRNLDRIPPVDEFI  
LMRRECTIGAALVEAMVEYSLDLIPSFVWEHPVIIGMSQVTSDIMTWPNDLCSFNKEQAD  
GDNQNFVCVLQHAHNLLNLQEAVDLLTKMIADRVQDYVKLKKRLPSFGPDIDPAVHKYVD  
ALEQFVQGCVVWYYSSPRYFPDIDPRGKSKAEIHLLSKPISSDPVQMH

>STC15

MSAATSQLLPSALATKIILPDLVAHCDFTLRYNRHRKQITRETKRWLFKGGNLNGKKRDAF  
HGLKAGLLTAMTYPDAAYPQLRVCNDFLTLYLHLDNLSDDMDNRGTRSTADVVLNSLYH  
PHTYYGPERVGKMTRDYKRMIVTASPGAQQRFIETFDFFFQSVTQQAIDRANGVIPDLES  
YIALRRDTSGCKPCWALIEYANNLNIPDEVMEHPHIVSLGEAANDLVTWSNDIFSYNVEQS  
KGDTHNMIPVVMNEEGLDLQSAIDFVGNMCRQSIDRFVEDRTNLPSWGPEIDKDVAVYV  
NGLADWIVGSLHWSFESERYFGKTGREVKANRVVNLLPRRA

>AbSTS05

MPRPQQFILPDLLSSCPLEDGLNPHYREAAAESRAWINSFNIFSNRKRADFIQGLNELLCSH  
VYCYAGYEEFRTTCDFVNVLFFVDEISDEQSGKDARATGLSYAESMRNADWDDNSVAK

ITKEFRARLIRRAGHNNFRRFVASSDAYTRCVGREAEELREAGEVLSLEEYmplRRNNSAVL  
LCFDLVEYILGVDPESIQNATFLKAYWAACDHVCWCNDVYSYNVEQSKGHTGNNVVT  
VLMNDRQIGLQEACDYIGDRCRQFMNDYLAARDEL RATVGGDASRFIDALGYWIIGNME  
WSFESPRYFGHEHDEIKRTLTLTKPSEVP EEVSDSDCE

>AbSTS07

MRAIEQLSNQPLSHKALEDGVRDVISDFLLKTNQTPKAPEQPDALVFERECWAEADRRGY  
DMHYLSKHLPVGILVSNAAYFYQSFELRLYIAYYTGLLLCVDDNFDIQSDGIARFMERYQR  
GECHPTDVLNNLADLLAETSTFFDPVATNLIMCATFSFMNAMVIENITAGTKIPSQAKRYP  
DYLRRFSGISKAYATFIFRPSVSAAQYIHALPELEDIINYVNDITSFYKEELAGEDENTVSL  
AKLNNRSKLDQLRVLSDSVAESHRRTLAILKGRDDAEGDYLLFWSGYIPFHVS AKRYRLM  
ELGIH

>AbSTS09

MGAVGQLSNQPLSREALDGV RDVISDFLLKTNQTPKAPEQPDAPVFERECWAEADRRG  
YDMHYLSKHLPVGILISNATFFYHSFELKLYVAYYSGILLCVDDNYDTQSRVDGIARFMER  
YQRGERHPTDILNNLADLLAETATFFDPVATNLIMCATFSFMNAMVIENITAGMKIPSQAK  
RYPDCLRQFTGISKAYAAFIFRPSVSAAQYIHALPELEDIINYVNDIASFYKEELAGEDENAV  
SLLARLNDRSKLDQLRVLSDSVAESHRRILAILKGRDDAERDYLLFWSGYIPFHLSTTRYR  
LMELGFN

>AvSTS01

MQSPTQASYRLPETLAGWPWPRMINPHYEEVKAESRAWFHSFRAFGPKSQDAFDKCDFW  
LLASLSYPFTDKARLRTGCDLMMLFFVFDEYTDLSHGNDVRVYADMVMDALRNPHKPRP  
AGEILLGEVARQFWELAVKTTTPTAQKRFVDAFTRYTDAVVAEARDRDETHVRSIDEYFNI  
RRYTIGAEP SYVPMELAMDIPDEVFFHPTVVKLTQLVTDVILLDNDLCSYNKEQANGEEL  
HNILTIVMAELKVDLNGALDWLERRHAELNEAIIETWNSLPVWDEDIRDDVDEYLLGVV  
GWVRSNDSWNFESQRYFGTDGLEIQKHRMVTMRPRKAGLGCPVEGDPLQELMV

>AvSTS03

MPEKFYIPNCLENWKWPRALNPYYEEVKAESA AWARSFGAFSPKAQHAYDRCDFNKLA  
CLAYPLLDKAGARIGCDLMNMFFVYDEYSDVAPADEVQVMADIIMDALRNPHKPRPEGE  
WVGGEVTRQFWELAIKTASPQSQKRFIKTFGTYTQSVVQQAADRDH HHYVRTVQEYLEVR  
RDTIGAKPSFAILEVGMDIPDEAIEHPIIQLTILSIDMILLGNDIASYNLEQARGDDNHNIVT  
IVMHQEKTDIKGAMDWVVQYHKTL EDRFMELYAQVPSLDFGERVNKELAVYVDGLGNW  
VRASDQWGFESERYFGKKAPEIQKTRWVTLMPKERTDEIGPQIVDG SML

>AvSTS06

MSTQIQFRLPDPVEICHWPLPRMLNAHYAEVKAECVAWIHSFNALSPKAQKAFDKCDFSL  
LASLIYPSLDRQHLRTGCDLMMLFFVFDEFTDKEDGKGVRKYVDIVVDAIEHPDRPRPAG  
EHVLGEITRQFWERAIQTASASSQRHFVKTFKEYAEAVIEEASDRVSDRVRSIDDY LALRRL  
TAGPYPGFFPCEIRVDLPDDVFYHHSVANLTRLVAESVVVTNDTYSYNIEQAAGHQGHNIV  
TVVMREKHL SLHQALEWVGNYHAGILTEFLESRKKLPSFGEELDAQVADYVEGLAHGVR  
GLDNWCFESGRYFGSKGLEVQKHRTVGLLPKVVQHDVATPMMALPVSDLDKMEVGESD  
LEKHQSSGWRYFDCFSCLSGRWMYL

>AvSTS07

MQSQIPLTHFRLPDPAANWPWPRTLHVNYEEIKA EADAWLHSFNALSSKAQRAFDKCD FS  
LLGCLLYPHLDKERARTGCELMILFFIFDEFTDQEDGPGVRRYVDIVLDALRNPHVPRPVG  
EHVLGEITRSFWERAIKTATAASQRHFIQTFSEYAEAVILEAADRASERVGIEDYLALRRLT



AGPYPGFLPCELRIDLPEAVYNHPALANMRRRLVAESIVLTNDTYSYNIEQAAGHDGHNIVT  
VAMRELHLALPAALEWVGAYHANILAEFVECRGELPSFAAEDAQIVEYVEGLAMGVRGL  
DAWCESARYFGTRGREIQRERVVGLLPKTVIVGGLATPMMAGPAVEGNSVVV

>AvSTS09

MLTSPGHFYLPDLLALSTPFHSSTNPHYKEAAESRAWINSYNVFTDRKRAFFVQGCNEL  
LVSHTYPHAGYAQFRTICDFVNLLFVVDEVSDDQSGADARKTGEVYLNAMRDPEWDDGS  
PLAKMTKEFRARLLGSCGPRSFARFLRHSEDYINCVALEAEYRERGEVLDMEAFKHLRRE  
NSAIRLCFGLFEFSLGIDLPDEVFQETTFSSIWAAADMVCWANDVYSYNMEQAKGHTGN  
NIVTVLMKAKGFDLQAASDYIGIYYAELMNRYIADKARLPSFGPSIDTDVQRYVTAMENW  
PIGNLVWSFETNRYFGPRHAEIKRTRLVILKPREEDT

>LnSTS01

MSPSSEIYFTIPNTLQNWPPRHINPNYNVCKAESSAWCEGFKAFTPKAQKAFNKCDFNL  
LASLAYPLLNKEGCRVGCGLMNLFFVIDEYSDVADQCGAREQADIVMDALRHPLKPRPEG  
EWVGGEIARQFWENAIARTATPSAQRRFIRMFD SYLNSVVQQAEDRTHNYIRDIQSYFDVRR  
DTIGAKPSFAINEIHLNISDEV MEDPIIKTLTSTSIDMLIIGNDLCSYNVEQARGDDGHNLVTI  
VMNERKIGLHAALQWISDLHDLRLAAEFLEAYKKLPSPIDPDVATYVDGLGNWVRGNDV  
WSFESERYFGVRGLEIQNRRIVQLLPKEKGEQGNTGLIPSTQGISVSTIKPSGFIQNILSSIWI  
KWGVTFVLVLMLSVASLRSIIILHRYELF

>LnSTS02

MSPSSEIYFTIPNTLQNWPPRHINPNYNVCKAESSAWCEGFKAFTPKAQKAFNKCDFNL  
LASLAYPLLNKEGCRVGCGLMNLFFVIDEYSDVADQCGAREQADIVMDALRHPLKPRPEG  
EWVGGEIARQFWENAIARTATPSAQRRFIRMFD SYLNSVVQQAEDRTHNYIRDIQSYFDVRR  
DTIGAKPSFAINEIHLNISDEV MEDPIIKTLTSTSIDMLIIGNDLCSYNVEQARGDDGHNLVTI  
VMNERKIGLHAALQWISDLHDLRLAAEFLEAYKKLPSPIDPDVATYVDGLGNWVRGNDV  
WSFESERYFGVRGLEIQNRRIVQLLPKEKGEQGNTGLIPSTQGISVSTIKPSGFIQNILSSIWI  
KWGVTFVLVLMLSVASLRSIIILHRYELF

>LnSTS04

MALITSLKSTERTTFVLPDLLANWPFNPEPNPRQDIVAQSAAWVESFNPFD AKAQNAFNR  
CKFGIFASLAYPHATGAHFRVACGLMNLFFVFDEYSDRADGEAVGKQAADIMNALRYPDT  
IPPEGDSLGLAMTRDFWLRTMKCASESSAQRFIRNFDEYTDVQRQAADRDAGCIRSVPE  
YFKIRRGITGVHPSFDYLLRDDL PDECVNHPDVQRLASAAVDMTILANDVYSYNKEQA  
KGEDSHNLVAVVMKEHDLTVQEAMDYIGDLYNHIRKQYCEKFQDLPRFNDDVDGLVREF  
CYGTGIWVTTNIKWSFASERYFGKEGMEIMKHRTVTLLPKVDKLFK

>LnSTS09

MNHTTTQILLPDLISMLPLEGATNPHYEKGAESRAWINSYNVFTDRKRAFFVLGSNELLV  
SHAYPYAGYDVFKICCDFVNVLFFVDELSDEQDGKDALT LGNIFVNAMTDPLWNDQSKFS  
RMTKEFRSRYTKLAGPNTTARFLKYWESYCAAVITEAELREKGQILDVDSFMELRRDNSA  
VRLCFGLIEFCFGTDLPDEVFEDPTFLKIYWAADVLCWANDVYSYDMEQSKGISGNNIVT  
VLMHDKNMDLQTAVDYVGTYSKELVDRFMDLQAHLPSWGS AVDSQVALFIKGLGYWVK  
GNLDWSFETQRYFGPKHMEIKNTLLVTLRPLECPEETDSESDE

>LnSTS19

MALYSLRSLPTLFSFAISPISPLDSSMNYHTYRLSDEEIERSIYRDFLRKMEYCKPDLHDAE  
KTLEQALRSEMYSRNMQCPQLEKTVHLAARLVELAYPDCTFEEQKVIALVNWVFIYLLD  
VDSEPCAAFPRLLRGQKQLDPVLDAFADVLSMHDYYDSLAAANQIVTSILNFINLTPVES

QIAAGTFTVPSRSRRFPGFLDRSGLGVPFALFAFPKSQGLDTAAYLRALPDMDFWICAAAN  
DLLSYHKEMLAGETNNYVSSRALVEKKTPLRVLVELERELEESRNVIHATLSSHPAAIKAW  
RAFEVGGVAWHLEQKRYKLKDLALDQQVTARG

>LnSTS20

MAPVSLIRPTSANVVQDLNKTGILRRFLQGMAYCPSNISGTNEELEKIMRAEMNNRNIRCP  
QLEKTLHLAASLIELGYHDCITLTKTNIALYNWYLIYIDDMSSKDTGPFMAFQERFLRRMP  
QLNPVLEALVGVLMRIYELYDMPTANSILSATFNFVNSTCIEPEIETLPLTRGLVRFPWFLRD  
QTGVAIAFALLLPKSKNVGVTDYIQALSDMNFVSVTNDILSFHKEELAGERANYVYNR  
AYIEDKVPLSVLAEMSQELFESRNAVYAALHCPQAADVWHTWEQGYVRWHIDQKRYK  
LSELSL

>LnSTS25

MSQDTSKAKFEMA AVLKEFLQETAYHPPTIPSTNEELENKMYEYMHGRNLACPQLERTLH  
LAASLIEIAFPECTLSEKTVIAIFNWFIIYIDDTSPGDVSPFVAFGPRFFSQTQQLDPVLDAFV  
DILQRICDQYEPATANYILASAFNYISSTCIEPEIEAHAVVPGVIRFPWFIRGQTGISLAFALM  
LFPKSKGVSAVQYIQVLEEMNFWISGVNDLMSFPKEQLAGERNNYVHVRARTEEKSPME  
VLAELNQELHMSRKLIIYAALSLIPGASTIWSAFENGYIKWHLIQERYKLAEMDLTG

>LnSTS27

MSTVTQLLNNFVHVVSRA GSLITPDLN GEFYDAPLS DAGDPPAKDDVTDLMTVGQILG  
KMLHDCHIPYCAVSFDYGLMKAPVAEAERRGYALEGPNSMRQALFLGVYLTSTMYAHVT  
DDDALRTYIIFYIMFMFYVDDKYFEQSDKESGLLHFIARFNQNPQAEP SLTNFADFLRDD  
TAAVFEPIGGGIIITSTLNFINGMILETSVKLGQISPYAQNFPYFVRNKSGFPEACVILAFPRD  
MPVRQYAQAFPEICDYLCYVNDIMSFYKEELVGETENLVSLAAVTDSKVEHLLSTDSPAP  
VTRNDKYGVLRRLSAAVASGHKKTLQILSGNPVAQDIYLKFAIQYVTMYISMRERYKLDE  
LRFGDKA

>PoSTS01

MSAIASSSAQAAPPSKIVIPDLVSHCTFELRVNRHRKIASAQSKRWLFRGDNLTGKKRDAY  
HGLKAGLLTSMCYPNAGAPQLRVCCDFMNYLFLHLDNLSDDMDNRGKSTADVVLNALY  
NPKMRQTKRVGKMTKDYWQRLIRTAAPGAQQRFIETFDFFFQAVSQQARDRAEGSIPDLE  
SYIALRRDTSGCKPCWALIEYANNLDIPDEVMDHPHRS LGEAANDLVTWSNDIFSYNVEQ  
SKGDTHNMIPVVMHEEGLELQAAVDFVGALCKQSIDRFVECRANLPCWGPEIDRQVAVY  
VEGLADWIVGSLHWSFESERYFGKSGLEVKKNRVINLLPRRS

>PoSTS02

MSTLISPDPHFILPDLVSDCTYPLRVNDNCEEVARVSEQWLLNAAHNERNKRR AFLGLKAG  
ELTAACYPDADAFHLRV CVDFMNYLFLNDDWLDEFDVEGTRGMHDCCIGVMRDPLNFE  
TDKRAGIMTKSFFSRFIETGGPGCTERFIHTMDLFFKAVAIQAADREKDVIPDFESYITIRRD  
TSGCKPCFALIEYASRIDLPDEVAEHPLIRSMEEATNDLVTWSNDLFSYNVEQSRGDTHNMI  
PVIMHQRDNLNQEAVEYVGALCKSSIQR FETDRKNLPTWGPEIDRDVAVYVEGLQNWIVG  
SLHWSFDSERYFGTSGLEVKKQRIVKLLPKVPS

>PoSTS03

MVPVASFIQEPSRAPSSFILPDLVSHCKFPLTYHPQGDAVALESVTWLDRLCPDLSPKARKA  
LWGLQAGELTAYCYPSCSPDRLRVSDFMNYLFLHLDNISDGMMTRETDLADSVMNAL  
WHPEEYRPTRSPGKEQPAEELDAGKIARDYWSRCIPGAGLGVQARFKESLQLFFEAVNVQ  
ARARDAGEVPDLESYIDVRRDTSGCKPVFDLIEYAMDFELPEEVVNHPVIKALNQGTNDL  
VTWSNDIFSYNVEQARGDTHNMIVILMKYHGHTLQSAVDYVGELCCQTINNFCANRQVIP

SWGPETDRMVQEYVQGLQDWITGSLHWSFKTHRYFGTNGAEVKKTRLVKLLPLKNGAN  
PCAGEATK

>PoSTS05

MSSQPTQIVLPDLLAMCPLKGYTNPHYKEAAAESVAWIDSYNVFTDRKRAFFVQGCNELL  
VSHTFPYAPYEQFRTCCDLVNLLFVIDEVSDDQSGKDARATGQVFLNALGDPEWNDGSL  
SRITKDFRARYFRLAGPNSSRRFLKHCEYINAVSTEAE LRERGEVLDIEPFTALRRENSAIR  
LCFGLFEYALGIDLPDEVFQDKTFQDMYFAAVDMVSWSNVSYNMEQAKGHSGNNIVT  
VLMKSKGMGIQEAVDHVG VHFQQIMDIYMDSKTRLPSWGSEVDVNIARYVEALGHWAK  
GNLDWSFETQRYFGAEHLEVMATRVVTLRPHGSPEDFDE

>PoSTS06

MTSTTKHPLPSHFILPDLLDQWPFETEPNPHQEIVDD SARWVESYKAFSPKAQDAFNRCNF  
GIFASLAYPRSEGTHYRAACDLMNLFVFDEFSDAENGDVVRQQAADIMNALRYPDKIPA  
GGDSILGAMTRDYWKRTLEVSSKSSAERFIRNFDGYTDAVRQEAVDRDEGRERSIEEYME  
LRRGTIGVYPSFDYFLLIEDDIPDEYIDHPAVASLALGAVDMTILANDVYSWNVEQCRGEDR  
HNLVAVAMREKGLSVQEAMDYVGTIYAGIRDKYVKEFNELPQFPEKYDKLVKDYCWHM  
GNWVTTNIKWSHFGERYFGKKGREILKHRTVEVMRPSVLGWVMRKSYP LIVTVKYAPRE  
YYYIAVTFMLLLLALLSSPSRARILGHSSFPSSF

>PoSTS11

MASHYRLPNLLALFNTDGARVNPRFHELDSQFNQWLDTLTLDAGFVETLKQIQMPVLISH  
AYPEASLGQLRTCLDYLTAFIFEEITENTSSSSQSQRWADLYMGMYRG TASVLSNIVPEETD  
HPLFPVMTSLAHNVMSLEPVFHESFITENLASVQAIVQE AIDREVDDAPS RQPRTEAYYI  
NRLATVGLMPFLILAQWTGGIRLPAFIQDSHSVQTMSQA AAVEMVFLANDIYSYKKEKMAG  
ATQNNVITVIIEDPSTSICEGNLQGSFDYSERLFQDALSRFYTHREMLLENVSDQQNYTADI  
NKFSRAMMDCVVGNIKWSMICRRYAVFECEQARNNEVVKI

>PoSTS16

MPVNIRDIVALHLRRCNIPYEV PVPDVKLQAACLN YAKNHGYEIGGKKT LGPCIPGGVVM  
ASNAFGHIADLPTRVIIGIYTAFMIYLD DISSSDIEAVAQFNQRFYRAEPQLDKVLDDFAQLL  
RDFPNYFCTAGSDMIVTSTLNFVTSLFMDVETEGMDVDGN AKRYPRFARILNGAALAYTL  
LVFPKSLPISSYIQAVPEINVYVENTNDVLSFYKEQ MAGDDIN YASLLSHSYSVTKYEALIH  
LSNIAVDANERILRLLEPVPEALEAYTRFRNGYVR FHTGLGGRYKLAE LKLTNISDYQDRL  
GAHVNQTACKVCQRNLCN

>TvSTS01

MAVIAAAPRPKRIFFPDLIAHCPYPLRYNPHCEAASAESKVWLMSGCRLSKKKRAAFHGL  
KGGLLTAMVYPEADYDQFRVCCDWINYLFHLDNICDEMDDRTTVSTAGVIIGALRDPHGF  
RPASAVGRLTQSFWRMSATASPGAQRRFIETFELFFRAVAQQARDRASGNIPDLESYIAMR  
RDTSGCKPCWALIEYANDLDLPDWVMDHPCVRGLEEAANDLVTWSNDIFSYNVEQSNGD  
THNMIVVVQTQEQLDLQSAVDYVGDLC LGCVDRFETLRAALPSWGPQIDDLAVYVQGL  
GDWMIGNLVWSFETERYFGRSGRKVRRALAVALLPRRK

>TvSTS05

MSSPSSFVLPDLHAVTPFKGSFNPHYPEAAAESEWVNSYKVLSDKKRAFFLQGGSELLC  
AHAYPYAGYQQFRTTCDFVNLLFTVDEISDDQNGKGAYETGLTFYNAMSNPAYDDGTVL  
CKMTKEFTARLLEHCGPQTYRRFIKHCKDYIEAVAVEADLRERGEVLDLEAYQTLRRENS  
AVRFCFGLAGYALGIDLPDEVVEHPAFMAMHLSTVDMVCWSNDLYSYNMEQAMGHTGN  
NVITVLMQHKGLDLQGAADYTG VHFKGLIDTFLDAKRSLPSWGP KLDGEVAQYAMAME

TWVIGNLNWSFETQRYFGHARHEIKRTRVVQLYPRRIVEESSDEEDN

>TvSTS06

MTSTTKHPLPSHFILPDLLDQWPFETEPNPHQEIVDD SARWVESYKAFSPKAQDAFNRCNF  
GIFASLAYPRSEGETHYRAACDLMNLFVFDEFSDAENG DVVRQQAADIMNALRYPDKIPA  
GGDSILGAMTRDYWKRTLEVSSKSSAERFIRNFDGYTDAVRQEAVDRDEGRERSIEEYME  
LRRGTIGVYPSFDYFLLEDDIPDEYIDHPAVASLALGAVDMTILANDVYSWNVEQCRGEDR  
HNLVAVAMREKGLSVQEAMDYVGTIYAGIRDKYVKEFNELPQFPEKYDKLVKDYCWWM  
GNWVTTNIKWSHFGERYFGKKGREILKHRTVEVMRPSVLGWVMRKSYP LIVTVKYAPRE  
YYYIAVTFLMLLLALLSSPSRARILGHSSFPSSF

>TvSTS07

MSRSLRLPDTLSRWPYPRRINPAYEEVSAESA AWLRSFHAFSDQAQVAFDKCKFGLLASLT  
YPNVDKDHLRAACDLMNVFFVFDEQTDIADTTTRTRELADIVIDAVRHPDRPRPEGEPIVGE  
ITRQFWAHACVNSTASGRARFEQEWTRYVESVVGQAEDRDAGRLRTTEEYLELRRFTIGA  
DPSYALAMARVDLPLAVSELPVFRKLRGCITDMLIFDNDLLSYRKEYAAGDDMHNITLV  
MNEKQIDVDAAVEWLAAEHAKRVDEFFVLWPQASAMSGSDELNQAVATYLDHLVNW  
RGDECWSFESGRYFGKDGARVKKERVIELKTRD

>TvSTS12

MSVEQLRPFPTHFRLKDLTAITSPVFEFKTNPHQEAAAQATNVWFERRNVYHGLKKQKFL  
SHRFD SYAGMSFPDADAAHLETCIAFFFWAFSFDLLSDEGALQSKPDAVQVGVDISMEVL  
KNPAAPAPNFPYAAMLHDIWRRFRSTASPGACNRFYRAVESWMNSQVEQARNRSTDEIPS  
VEDFIILRRRTIGGPIVEAMVEYSLNLQIPEYVWDHPVLQEMSKAVIDIMTWPNDLCSFNK  
EQADGDFQNLVFCIMIERDVDLQRAVDILTDMLAQRVADYVRYRDQLPSFGPEVDAELAR  
YNKAMEQYTQGTVVWYYSYSPRYFRGQDVSGKTEIVVPVYERAAPVEEAAPAPHVSTTDS  
EKGAVYASFRFPFSAFPHLSLLLLSLFACLLYVNLPSLGLRLALP

>TvSTS14

MPYIQDACSSPLPLCASVDAITEIKDILKDFLRRLNYRSPHTPANAKLRAEVTAEIASWNAD  
LSPSFKHGLAETCYTIAESAYAHTSYEHQRIIALYTTYLT YVDDLGGRDLDALGEFGRLL  
AREALGDSALDRLVTNLQDMYAYPRLSAHSIAVSTLDFFVGSYVEATGKEMAVAPGATK  
YPGYMRMKTGIGAAYALFNFKDWRDPADHFFLQLIPEIEFYTD TINDILSFYKESLAGET  
DNLHLRAAAEQKDPLSVLRDVVEETLESIRKVEVLTAADPQLAKICRSYVVG YVEFHFR  
KRYRLEDLEMEY

>TvSTS16

MVAEVLPS PANPFLVYANGVSPILPTSLSHIDGHVYRSGSNDSNGLSRLLVTGPQGLPPAITP  
EAIQEMKAIMQDFLQQCN YEDPSTPKDIELRERMALEMAAWSLDLPATFIEQVHETSCHFI  
ETAYVHTTLEHRFFVARYCAYFLYADDLPGRCLDALIQFPRRFANREQQLDPILNRLAEMIR  
GAHELWTDVGASAIAGTLDALTA FYIEYTTCGLAVKPQAVRYPYYLR LKSGIDPPFVAFIF  
MRGWRDTAESYVQMLPEIEY WIGATNDLLSFYKEELAQETNNYIHIRAAMEQTTGLVILR  
KLADEILD TTRIEGLAAEDAELAALWHGYKQGFLEFQIKAPRYRLSDLGLTE

>DS3

MTPTDIDNTSSHSNLYTAIIFDLGDVLFTWSLSSNPPLPEKLLRRILSSSHWFEYEKGNINEA  
EVYSLVARDFLVDPAALKNTLQVAQDSLQSNKKMLGVIQELKEAGLLIYAMSNISAPYLEI  
LERKATPSQWALFDHVFTSASAHQRKPNLGFFKHVIERTGIDPSCTIFVDDKLE NVLTARSF  
GMHGIIFDNESKVIKDLKNLCYDPVLRGKRFLTSHKKNLKT VTSNGIEFMDDYSQLVILLA  
TGDDSLVDYVKSPGQFNVPDGT LFTTEVYPNDLDTTAIGLTVTDHVDAGTKHKIMDEML

EYRDSGDGIIQVYFDHSRPRIDPVVCINVLNLCENGRGHELPETLDWVEQVLIHRAYISGTT  
YYIGADVFLFFLSRLLQNSAEVRRRLGSIFKERVIERFGVKGDSL SLSARMIAATVAGVIDE  
GALKNLLSMQCEDGSWDDSWFWRWGMSPIMAKNDGVT TALAIWAIERVQSLRKE

>SiTPS

MPSVSPATIRLPDILGAMDRFELRTHPDEREVTRASNEWFNSYNMMPALFEKFVKCDFGL  
MTGMSYPDTDATRLRITCDYMSILFAYDDLMDLPSSDLMHDKIASDKAAKIMMGVLTHP  
HKFRPYAGLPVATAFHDFWTRFCATSTPKMQKRFTDTTYEYVMAVKNQCGNRQSSRCPTI  
EEYVALRRDTSIAIKVTYACIEYCLNIDVPDEAFYHPSVAALQEAGNDILSWANDVYSFDNE  
QSSGDCHNLVAIVAINKNITVQAAMEYVMGMIDSAIERFFEECANVPSFGPEVDPLVQAYI  
KGVELYLSGSVFWHLESERYFGARVQHVKDTLMVELRPLDEGAKPAFDLMYKLP SNLTP  
EVL SAAAVSAAPAAPVAPVAPQPEILSPTPISPINVNFP LGNVACPPPSYETQ RVLAKMVA  
ATVEEKQRLAYSQPAEQYYSPAPQYYPSQPVEKFQQTNVLETAFKGSNSELTNILVIASVL  
MAGSPMALVPFVPLLALLLPNETPVAPVA

>IIIS

MSQQSEAQTHAASEAPAQQPEMLYLPETMKNWPWPRAINPYEEVTRESNAWFKSFKPF  
NERSQYGYDLCDFGRLASLAYPYVSREHLRTGIDLMNVFFV VDEYTDVEPLPVVKEMIEI  
VIDAIKNPSKPRPEGEIILGEIARQFWARGEKTATPEAAKH FVEAFTDYLSNVIVQASDRDN  
DKIRTVDEYFQTRRENIGARPSYVPGELHLSIPDYAFYHPVMKELEYLIADLIILDNDIASY  
NKEQATGDDRHNILTIVMHQFNLSLPDAMKWVVKYHDEVEAKFLDGLKRVPSWGKEVD  
DQVAVYIEHXLLVGLAATTAGTSRVAGISVARDLR SRRLVWCPFSQRESWLLTFTRKMSKF  
LL

>LbSTS4a

MAPTTQQQLHIPDLLSILNIQSDTNPYEDVVRPETEKWVSSYGIFTGT SWDKFLASDVPRF  
SSRTFSYADRDKLRDCTDFCLLMFALDDITDDEDQKEGTLTGQACIRTMQSDGPLLSSSPG  
ERMIKDYRARFFKSTGPVLQRRLLKDWEATFNAFPKELEVRESKEVLSIEEYTLIRRDNCA  
LRMGFTHIEYALGIELPDEVYQNPVFNEMYLAALDMAWLLNDVYSYGKEHAKGQATWN  
YLTCVMHEKSIDLQTAADYSGIKFRELYDRFIDGKSRLPSWGKPLDS DVAVFLEGLGIWLA  
GTLRWCFEMPRYFGPRYEDVRFTYLVDLGVFEG

>LbSTS6

MLTDLAYWVRTFLAFDVGTIKGAPLEPLLEKLSTQSVIADPHDEIKNAVTNLLAECNLPPF  
VTPYNHEFHNAACCQVARSKGYAMETYPGARSLHPFMPGGVVMATTAYAHLDNKSTQIFIA  
LYTAFLIYLDDVFQHDIELVYCFNERFILCQPQDDPVLDGFASLLREFPQHFGRVVSNIMTT  
STLNLVTALLLEHETQNMKSSLDAHNYPTFSRVMSGASETYALFAFPQIPMPFYIQALPED  
MMFINNVNDVLSFYKEDSAGETVNRVSNLARCHGVSKMEVIHRLSQDAATCHSQVLRILS  
PHRDAHTAYANFSQGYIGFHASLARYRLNELFS
